# Supplementary material for: Transcriptome analysis of follicles reveals the importance of autophagy and hormones in regulating broodiness of Zhedong white goose
Source: PubMed Central journal article supplement (PMC5105085; doi:10.1038/srep36877), 2016-11-11

# **Transcriptome analysis of follicles reveals the importance of autophagy and hormones in regulating broodiness of Zhedong white goose**

Jing Yu<sup>#</sup>, Yaping Lou<sup>#</sup>, Ayong Zhao<sup>\*</sup>

## **Supplemental data**

### **Supplemental Table Legends**

Table S1 Analysis of sample correlation

Table S2 Mapped statistical results of 18 libraries

Table S3 Differentially expressed hormone-related genes during the period between egg-laying and broody goose follicles

Table S4 Differentially expressed progesterone-related genes during the period between egg-laying and broody goose follicles

Table S5 Differentially expressed GnRH-related genes during the period between egg-laying and broody goose follicles

Table S6 Differentially expressed steroid-related genes during the period between egg-laying and broody goose follicles

Table S7 Differentially expressed transcription factors during the period between egg-laying and broody goose follicles

Table S8 Analysis of autophagy-related genes during the period between egg-laying and broody goose follicles

### **Supplemental Figure Legends**

Figure S1 Map of gene expression density

Table S1 Analysis of sample correlation

|        | BSWF1 | BSWF2 | BSWF4 | BLWF1 | BLWF3 | BLWF4 | BSYF1 | BSYF3 | BSYF4 | LSWF11 | LLWF11 | LLWF12 | LLWF13 | LSYF11 | LSYF12 | LSYF13 |
|--------|-------|-------|-------|-------|-------|-------|-------|-------|-------|--------|--------|--------|--------|--------|--------|--------|
| BSWF1  | 1.00  | 0.81  | 0.89  | 0.95  | 0.78  | 0.86  | 0.99  | 0.93  | 0.93  | 0.89   | 0.88   | 0.83   | 0.52   | 0.74   | 0.90   | 0.92   |
| BSWF2  | 0.81  | 1.00  | 0.83  | 0.78  | 0.83  | 0.87  | 0.80  | 0.84  | 0.80  | 0.86   | 0.70   | 0.81   | 0.65   | 0.76   | 0.73   | 0.86   |
| BSWF4  | 0.89  | 0.83  | 1.00  | 0.84  | 0.80  | 0.89  | 0.88  | 0.92  | 0.90  | 0.87   | 0.83   | 0.81   | 0.53   | 0.73   | 0.86   | 0.89   |
| BLWF1  | 0.95  | 0.78  | 0.84  | 1.00  | 0.84  | 0.88  | 0.97  | 0.85  | 0.83  | 0.83   | 0.74   | 0.80   | 0.56   | 0.74   | 0.77   | 0.87   |
| BLWF3  | 0.78  | 0.83  | 0.80  | 0.84  | 1.00  | 0.93  | 0.79  | 0.81  | 0.71  | 0.83   | 0.56   | 0.77   | 0.70   | 0.80   | 0.59   | 0.84   |
| BLWF4  | 0.86  | 0.87  | 0.89  | 0.88  | 0.93  | 1.00  | 0.86  | 0.91  | 0.85  | 0.88   | 0.71   | 0.81   | 0.61   | 0.77   | 0.74   | 0.90   |
| BSYF1  | 0.99  | 0.80  | 0.88  | 0.97  | 0.79  | 0.86  | 1.00  | 0.90  | 0.90  | 0.88   | 0.85   | 0.83   | 0.55   | 0.76   | 0.87   | 0.90   |
| BSYF3  | 0.93  | 0.84  | 0.92  | 0.85  | 0.81  | 0.91  | 0.90  | 1.00  | 0.98  | 0.91   | 0.92   | 0.84   | 0.48   | 0.71   | 0.93   | 0.92   |
| BSYF4  | 0.93  | 0.80  | 0.90  | 0.83  | 0.71  | 0.85  | 0.90  | 0.98  | 1.00  | 0.89   | 0.97   | 0.81   | 0.43   | 0.67   | 0.97   | 0.88   |
| LSWF11 | 0.89  | 0.86  | 0.87  | 0.83  | 0.83  | 0.88  | 0.88  | 0.91  | 0.89  | 1.00   | 0.84   | 0.90   | 0.74   | 0.89   | 0.84   | 0.91   |
| LLWF11 | 0.88  | 0.70  | 0.83  | 0.74  | 0.56  | 0.71  | 0.85  | 0.92  | 0.97  | 0.84   | 1.00   | 0.78   | 0.37   | 0.62   | 0.99   | 0.82   |
| LLWF12 | 0.83  | 0.81  | 0.81  | 0.80  | 0.77  | 0.81  | 0.83  | 0.84  | 0.81  | 0.90   | 0.78   | 1.00   | 0.77   | 0.87   | 0.80   | 0.89   |
| LLWF13 | 0.52  | 0.65  | 0.53  | 0.56  | 0.70  | 0.61  | 0.55  | 0.48  | 0.43  | 0.74   | 0.37   | 0.77   | 1.00   | 0.90   | 0.37   | 0.65   |
| LSYF11 | 0.74  | 0.76  | 0.73  | 0.74  | 0.80  | 0.77  | 0.76  | 0.71  | 0.67  | 0.89   | 0.62   | 0.87   | 0.90   | 1.00   | 0.63   | 0.83   |
| LSYF12 | 0.90  | 0.73  | 0.86  | 0.77  | 0.59  | 0.74  | 0.87  | 0.93  | 0.97  | 0.84   | 0.99   | 0.80   | 0.37   | 0.63   | 1.00   | 0.85   |
| LSYF13 | 0.92  | 0.86  | 0.89  | 0.87  | 0.84  | 0.90  | 0.90  | 0.92  | 0.88  | 0.91   | 0.82   | 0.89   | 0.65   | 0.83   | 0.85   | 1.00   |

Table S2 Mapped statistical results of 18 libraries

| Sample              | BSWF<br>1                | BSWF<br>2                | BSWF<br>4                | BLWF1                    | BLWF3                    | BLWF4                    | BSYF1                    | BSYF3                    | BSYF4                    | LSWF1<br>1               | LSWF1<br>2               | LSWF1<br>3               | LLWF1<br>1               | LLWF1<br>2               | LLWF1<br>3               | LSYF11                   | LSYF12                   | LSYF13                   |
|---------------------|--------------------------|--------------------------|--------------------------|--------------------------|--------------------------|--------------------------|--------------------------|--------------------------|--------------------------|--------------------------|--------------------------|--------------------------|--------------------------|--------------------------|--------------------------|--------------------------|--------------------------|--------------------------|
| Valid reads         | 29846<br>346             | 33732<br>832             | 34397<br>820             | 65818<br>230             | 59002<br>520             | 47209<br>250             | 57284<br>462             | 99189<br>858             | 35180<br>814             | 50380<br>606             | 46002<br>046             | 44107<br>068             | 34053<br>388             | 32305<br>532             | 34394<br>692             | 33811<br>710             | 31380<br>150             | 30141<br>568             |
| Mapped reads        | 17479<br>292(58<br>.56%) | 21129<br>671(62<br>.64%) | 22481<br>263(65<br>.36%) | 42519<br>819(64<br>.60%) | 38541<br>790(65<br>.32%) | 30912<br>946(65<br>.48%) | 35860<br>538(62<br>.60%) | 63004<br>627(63<br>.52%) | 22084<br>002(62<br>.77%) | 30716<br>145(60<br>.97%) | 32515<br>456(70<br>.68%) | 31551<br>474(71<br>.53%) | 20867<br>516(61<br>.28%) | 22142<br>860(68<br>.54%) | 22602<br>311(65<br>.71%) | 21832<br>266(64<br>.57%) | 20368<br>266(64<br>.91%) | 19969<br>215(66<br>.25%) |
| Unique Mapped reads | 17143<br>785(57<br>.44%) | 20724<br>990(61<br>.44%) | 21961<br>185(63<br>.84%) | 41719<br>762(63<br>.39%) | 38222<br>735(64<br>.78%) | 29960<br>769(63<br>.46%) | 35222<br>681(61<br>.49%) | 62111<br>769(62<br>.62%) | 21789<br>011(61<br>.93%) | 30497<br>002(60<br>.53%) | 32313<br>399(70<br>.24%) | 31155<br>519(70<br>.64%) | 20757<br>585(60<br>.96%) | 21998<br>760(68<br>.10%) | 22451<br>999(65<br>.28%) | 21685<br>935(64<br>.14%) | 20206<br>389(64<br>.39%) | 19749<br>074(65<br>.52%) |
| Multi Mapped reads  | 33550<br>7(1.12<br>%)    | 40468<br>1(1.20<br>%)    | 52007<br>8(1.51<br>%)    | 80005<br>7(1.22<br>%)    | 31905<br>5(0.54<br>%)    | 95217<br>7(2.02<br>%)    | 63785<br>7(1.11<br>%)    | 89285<br>8(0.90<br>%)    | 29499<br>1(0.84<br>%)    | 21914<br>3(0.43<br>%)    | 20205<br>7(0.44<br>%)    | 39595<br>5(0.90<br>%)    | 10993<br>1(0.32<br>%)    | 14410<br>0(0.45<br>%)    | 15031<br>2(0.44<br>%)    | 14633<br>1(0.43<br>%)    | 16187<br>7(0.52<br>%)    | 22014<br>1(0.73<br>%)    |
| PE Mapped reads     | 66756<br>85(22.<br>37%)  | 82120<br>60(24.<br>34%)  | 87884<br>38(25.<br>55%)  | 16258<br>350(24<br>.70%) | 14963<br>478(25<br>.36%) | 11891<br>401(25<br>.19%) | 13759<br>154(24<br>.02%) | 24229<br>114(24<br>.43%) | 85307<br>82(24.<br>25%)  | 11546<br>176(22<br>.92%) | 13731<br>920(29<br>.85%) | 13373<br>020(30<br>.32%) | 76410<br>51(22.<br>44%)  | 88202<br>30(27.<br>30%)  | 88634<br>50(25.<br>77%)  | 81140<br>38(24.<br>00%)  | 75626<br>84(24.<br>10%)  | 76985<br>31(25.<br>54%)  |
| Mapped left reads   | 91287<br>95(30.<br>59%)  | 11319<br>942(33<br>.56%) | 12059<br>991(35<br>.06%) | 22994<br>832(34<br>.94%) | 20562<br>860(34<br>.85%) | 16837<br>478(35<br>.67%) | 19422<br>937(33<br>.91%) | 33725<br>938(34<br>.00%) | 11908<br>208(33<br>.85%) | 16472<br>705(32<br>.70%) | 17127<br>156(37<br>.23%) | 16700<br>396(37<br>.86%) | 98543<br>39(28.<br>94%)  | 10900<br>843(33<br>.74%) | 11164<br>507(32<br>.46%) | 10819<br>030(32<br>.00%) | 10039<br>426(31<br>.99%) | 98951<br>46(32.<br>83%)  |
| Mapped right reads  | 83504<br>97(27.<br>98%)  | 98097<br>29(29.<br>08%)  | 10421<br>272(30<br>.30%) | 19524<br>987(29<br>.67%) | 17978<br>930(30<br>.47%) | 14075<br>468(29<br>.82%) | 16437<br>601(28<br>.69%) | 29278<br>689(29<br>.52%) | 10175<br>794(28<br>.92%) | 14243<br>440(28<br>.27%) | 15388<br>300(33<br>.45%) | 14851<br>078(33<br>.67%) | 11013<br>177(32<br>.34%) | 11242<br>017(34<br>.80%) | 11437<br>804(33<br>.25%) | 11013<br>236(32<br>.57%) | 10328<br>840(32<br>.92%) | 10074<br>069(33<br>.42%) |
| Reads map to sense  | 85715<br>47(28.<br>%)    | 10375<br>320(30<br>%)    | 10990<br>408(31<br>%)    | 20905<br>356(31<br>%)    | 19122<br>893(32<br>%)    | 15044<br>031(31<br>%)    | 17626<br>045(30<br>%)    | 31124<br>656(31<br>%)    | 10908<br>723(31<br>%)    | 15257<br>766(30<br>%)    | 16122<br>209(35<br>%)    | 15613<br>966(35<br>%)    | 10348<br>754(30<br>%)    | 10968<br>346(33<br>%)    | 11189<br>657(32<br>%)    | 10811<br>449(31<br>%)    | 10085<br>410(32<br>%)    | 98634<br>93(32.<br>%)    |

|                                        |                          |                          |                          |                          |                          |                          |                          |                          |                          |                          |                          |                          |                          |                          |                          |                          |                          |                          |
|----------------------------------------|--------------------------|--------------------------|--------------------------|--------------------------|--------------------------|--------------------------|--------------------------|--------------------------|--------------------------|--------------------------|--------------------------|--------------------------|--------------------------|--------------------------|--------------------------|--------------------------|--------------------------|--------------------------|
| strand                                 | 72%)                     | .76%)                    | .95%)                    | .76%)                    | .41%)                    | .87%)                    | .77%)                    | .38%)                    | .01%)                    | .28%)                    | .05%)                    | .40%)                    | .39%)                    | .95%)                    | .53%)                    | .98%)                    | .14%)                    | 72%)                     |
| Reads map<br>to<br>antisense<br>strand | 85722<br>38(28.<br>72%)  | 10349<br>670(30<br>.68%) | 10970<br>777(31<br>.89%) | 20814<br>406(31<br>.62%) | 19099<br>842(32<br>.37%) | 14916<br>738(31<br>.60%) | 17596<br>636(30<br>.72%) | 30987<br>113(31<br>.24%) | 10880<br>288(30<br>.93%) | 15239<br>236(30<br>.25%) | 16191<br>190(35<br>.20%) | 15541<br>553(35<br>.24%) | 10408<br>831(30<br>.57%) | 11030<br>414(34<br>.14%) | 11262<br>342(32<br>.74%) | 10874<br>486(32<br>.16%) | 10120<br>979(32<br>.25%) | 98855<br>81(32.<br>80%)  |
| Non-splice<br>reads                    | 10471<br>949(35<br>.09%) | 12418<br>971(36<br>.82%) | 13266<br>012(38<br>.57%) | 24668<br>007(37<br>.48%) | 22453<br>286(38<br>.05%) | 17126<br>860(36<br>.28%) | 20636<br>190(36<br>.02%) | 38225<br>152(38<br>.54%) | 12399<br>487(35<br>.25%) | 18667<br>618(37<br>.05%) | 17889<br>605(38<br>.89%) | 17679<br>604(40<br>.08%) | 12202<br>717(35<br>.83%) | 12568<br>145(38<br>.90%) | 12583<br>623(36<br>.59%) | 13047<br>033(38<br>.59%) | 13096<br>449(41<br>.73%) | 13338<br>847(44<br>.25%) |
| Splice<br>reads                        | 66718<br>36(22.<br>35%)  | 83060<br>19(24.<br>62%)  | 86951<br>73(25.<br>28%)  | 17051<br>755(25<br>.91%) | 15769<br>449(26<br>.73%) | 12833<br>909(27<br>.19%) | 14586<br>491(25<br>.46%) | 23886<br>617(24<br>.08%) | 93895<br>24(26.<br>69%)  | 11829<br>384(23<br>.48%) | 14423<br>794(31<br>.35%) | 13475<br>915(30<br>.55%) | 85548<br>68(25.<br>12%)  | 94306<br>15(29.<br>19%)  | 98683<br>76(28.<br>69%)  | 86389<br>02(25.<br>55%)  | 71099<br>40(22.<br>66%)  | 64102<br>27(21.<br>27%)  |

Table S3 Differentially expressed hormone-related genes during the period between egg-laying and broody goose follicles

| gene_id     |         |                                                                             | LSWF  | BSWF  | LLWF  | BLWF  | LSYF  | BSYF  |
|-------------|---------|-----------------------------------------------------------------------------|-------|-------|-------|-------|-------|-------|
| XLOC_001587 | NR1H3   | "nuclear receptor subfamily 1, group H, member 3"                           | 24.9  | 68.9  | 17.6  | 72.8  | 23.8  | 70.2  |
| XLOC_002168 | TPH2    | tryptophan hydroxylase 2                                                    | 55.3  | 18.3  | 66.6  | 16.7  | 50.9  | 10.8  |
| XLOC_002616 | INHBA   | "inhibin, alpha"                                                            | 1.0   | 22.2  | 0.7   | 66.6  | 8.6   | 96.4  |
| XLOC_003012 | NR1D2   | "nuclear receptor subfamily 1, group D, member 2"                           | 17.0  | 30.9  | 11.6  | 31.3  | 13.7  | 30.5  |
| XLOC_004062 | AKR1D1  | "aldo-keto reductase family 1, member D1"                                   | 563.8 | 109.3 | 449.9 | 134.0 | 235.5 | 61.1  |
| XLOC_004497 | TBX3    | T-box 3                                                                     | 2.9   | 19.7  | 1.4   | 16.7  | 2.1   | 17.7  |
| XLOC_005914 | NR3C1   | "nuclear receptor subfamily 3, group C, member 1 (glucocorticoid receptor)" | 9.8   | 22.9  | 9.2   | 25.4  | 12.9  | 24.5  |
| XLOC_007274 | CALCB   | calcitonin-related polypeptide beta                                         | 21.2  | 5.0   | 18.6  | 2.4   | 8.4   | 1.8   |
| XLOC_007538 | MED17   | mediator complex subunit 17                                                 | 95.6  | 25.7  | 55.8  | 25.0  | 42.7  | 23.3  |
| XLOC_007585 | VIP     | vasoactive intestinal peptide                                               | 0.3   | 5.5   | 0.2   | 3.0   | 0.3   | 4.6   |
| XLOC_008367 | MC5R    | melanocortin 5 receptor                                                     | 0.4   | 2.7   | 0.1   | 12.1  | 0.5   | 6.4   |
| XLOC_008534 | TNFSF11 | "tumor necrosis factor (ligand) superfamily, member 11"                     | 25.4  | 3.3   | 12.1  | 2.3   | 5.5   | 2.2   |
| XLOC_008821 | MRAP2   | melanocortin 2 receptor accessory protein 2                                 | 13.9  | 41.1  | 12.0  | 38.9  | 13.5  | 25.8  |
| XLOC_009946 | NPR3    | natriuretic peptide receptor 3                                              | 0.7   | 2.7   | 0.4   | 4.0   | 0.9   | 2.7   |
| XLOC_010065 | NR2F2   | "nuclear receptor subfamily 2, group F, member 2"                           | 10.5  | 97.9  | 6.7   | 106.5 | 15.9  | 119.6 |
| XLOC_013548 | TGFBR3  | "transforming growth factor, beta receptor III"                             | 10.0  | 39.6  | 11.3  | 50.4  | 15.0  | 39.8  |
| XLOC_014279 | PPARG   | peroxisome proliferator-activated receptor gamma                            | 4.9   | 13.3  | 4.0   | 25.5  | 9.4   | 23.1  |
| XLOC_016060 | FHL2    | four and a half LIM domains 2                                               | 8.9   | 42.0  | 7.1   | 50.3  | 14.3  | 43.9  |
| XLOC_016411 | AREG    | amphiregulin                                                                | 38.1  | 11.0  | 38.9  | 16.3  | 21.2  | 6.3   |
| XLOC_016464 | NR5A2   | "nuclear receptor subfamily 5, group A, member 2"                           | 0.2   | 1.5   | 0.1   | 25.9  | 0.3   | 8.8   |
| XLOC_017817 | LHCGR   | luteinizing hormone chorionic gonadotropin receptor                         | 12.0  | 49.4  | 5.2   | 75.3  | 8.3   | 65.9  |
| XLOC_017819 | FSHR    | follicle stimulating hormone receptor                                       | 22.3  | 37.8  | 23.1  | 42.7  | 53.8  | 36.4  |

|                    |              |                                                                                  |      |       |      |       |      |       |
|--------------------|--------------|----------------------------------------------------------------------------------|------|-------|------|-------|------|-------|
| <b>XLOC_017990</b> | NROB1        | "nuclear receptor subfamily 0, group B, member 1"                                | 59.2 | 142.2 | 49.3 | 139.9 | 71.1 | 125.1 |
| <b>XLOC_019017</b> | RXRA         | "retinoid X receptor, alpha"                                                     | 1.2  | 7.0   | 1.1  | 7.7   | 1.2  | 6.1   |
| <b>XLOC_019544</b> | DIO2         | "deiodinase, iodothyronine, type II"                                             | 0.5  | 4.5   | 0.5  | 7.9   | 0.9  | 7.1   |
| <b>XLOC_022118</b> | PTH1R        | parathyroid hormone 1 receptor                                                   | 0.3  | 1.5   | 0.2  | 1.8   | 0.5  | 1.7   |
| <b>XLOC_022413</b> | LOC106047032 | glucagon family neuropeptides-like                                               | 5.4  | 1.6   | 4.1  | 0.6   | 2.8  | 1.1   |
| <b>XLOC_023019</b> | OSTN         | osteocrin                                                                        | 9.3  | 18.2  | 7.8  | 29.7  | 6.6  | 13.8  |
| <b>XLOC_023252</b> | DIO3         | "deiodinase, iodothyronine, type III"                                            | 17.9 | 66.1  | 13.8 | 81.0  | 22.0 | 84.7  |
| <b>XLOC_023487</b> | STAT3        | signal transducer and activator of transcription 3 (acute-phase response factor) | 44.3 | 78.4  | 41.0 | 109.1 | 20.8 | 84.0  |
| <b>XLOC_024345</b> | SOST         | sclerostin                                                                       | 3.6  | 1.0   | 3.0  | 0.6   | 1.8  | 0.7   |
| <b>XLOC_025448</b> | MED24        | mediator complex subunit 24                                                      | 13.3 | 24.8  | 15.5 | 25.9  | 11.1 | 26.7  |

Table S4 Differentially expressed progesterone-related genes during the period between egg-laying and broody goose follicles

| gene_id     |          |                                                                           | LSWF  | BSWF | LLWF  | BLWF | LSYF  | BSYF  |
|-------------|----------|---------------------------------------------------------------------------|-------|------|-------|------|-------|-------|
| XLOC_000297 | MMS19    | "MMS19 homolog, cytosolic iron-sulfur assembly component"                 | 11.4  | 16.4 | 13.9  | 15.3 | 9.2   | 15.8  |
| XLOC_000357 | MAPK8    | mitogen-activated protein kinase 8                                        | 15.0  | 8.6  | 14.8  | 8.6  | 14.9  | 8.2   |
| XLOC_000483 | CDK1     | cyclin-dependent kinase 1                                                 | 112.4 | 94.7 | 193.9 | 85.0 | 302.4 | 161.2 |
| XLOC_000669 | CPEB2    | cytoplasmic polyadenylation element binding protein 2                     | 1.9   | 2.2  | 1.3   | 3.0  | 2.6   | 2.4   |
| XLOC_000704 | ANAPC4   | anaphase promoting complex subunit 4                                      | 12.8  | 13.4 | 16.2  | 13.0 | 22.1  | 14.6  |
| XLOC_001073 | CFAP44   | cilia and flagella associated protein 44                                  | 0.5   | 0.2  | 0.3   | 0.2  | 0.1   | 0.1   |
| XLOC_002383 | HSP90AB1 | "heat shock protein 90kDa alpha (cytosolic), class B member 1"            | 31.5  | 26.9 | 27.4  | 30.0 | 18.3  | 31.5  |
| XLOC_002488 | AKT3     | v-akt murine thymoma viral oncogene homolog 3                             | 11.1  | 7.8  | 9.1   | 9.1  | 9.5   | 7.8   |
| XLOC_002599 | ADCY5    | adenylate cyclase 5                                                       | 0.0   | 0.2  | 0.0   | 0.1  | 0.4   | 0.4   |
| XLOC_002779 | ADCY5    | adenylate cyclase 5                                                       | 1.6   | 4.4  | 1.4   | 4.5  | 2.5   | 5.1   |
| XLOC_003902 | BICD1    | bicaudal D homolog 1 (Drosophila)                                         | 6.2   | 2.9  | 6.7   | 2.7  | 2.8   | 1.6   |
| XLOC_003915 | BRAF     | "B-Raf proto-oncogene, serinethreonine kinase"                            | 16.7  | 4.5  | 10.2  | 5.2  | 4.9   | 3.4   |
| XLOC_004136 | ANAPC5   | anaphase promoting complex subunit 5                                      | 73.1  | 48.1 | 54.7  | 54.9 | 47.1  | 59.1  |
| XLOC_004348 | ANAPC7   | anaphase promoting complex subunit 7                                      | 45.4  | 26.7 | 51.5  | 26.6 | 40.1  | 23.7  |
| XLOC_004416 | MAPK1    | mitogen-activated protein kinase 1                                        | 100.3 | 87.8 | 126.0 | 90.7 | 130.8 | 92.5  |
| XLOC_004703 | RPS6KC1  | "ribosomal protein S6 kinase, 52kDa, polypeptide 1"                       | 22.7  | 17.6 | 24.6  | 17.6 | 19.8  | 18.1  |
| XLOC_005136 | PIK3CA   | "phosphatidylinositol-4,5-bisphosphate 3-kinase, catalytic subunit alpha" | 9.9   | 9.3  | 12.8  | 11.4 | 11.8  | 8.8   |
| XLOC_005503 | ANAPC10  | anaphase promoting complex subunit 10                                     | 26.5  | 10.8 | 24.1  | 10.1 | 25.5  | 12.1  |
| XLOC_005660 | FAM184A  | "family with sequence similarity 184, member A"                           | 17.5  | 5.5  | 15.6  | 5.2  | 13.5  | 5.3   |
| XLOC_005898 | CDC23    | cell division cycle 23                                                    | 11.4  | 8.7  | 11.8  | 9.0  | 9.6   | 9.3   |
| XLOC_006129 | MAPK9    | mitogen-activated protein kinase 9                                        | 6.2   | 8.0  | 5.7   | 9.1  | 9.0   | 9.5   |



|                    |           |                                                                                           |       |       |        |       |        |       |
|--------------------|-----------|-------------------------------------------------------------------------------------------|-------|-------|--------|-------|--------|-------|
| <b>XLOC_006279</b> | LOC106032 | phosphatidylinositol 3-kinase regulatory subunit alpha-like<br>954                        | 0.0   | 0.1   | 0.0    | 0.1   |        |       |
| <b>XLOC_006280</b> | PIK3R3    | "phosphoinositide-3-kinase, regulatory subunit 3 (gamma)"                                 | 33.3  | 18.4  | 21.2   | 28.7  | 11.1   | 21.8  |
| <b>XLOC_006661</b> | ADCY9     | adenylate cyclase 9                                                                       | 11.8  | 15.5  | 11.9   | 16.6  | 12.5   | 15.5  |
| <b>XLOC_006696</b> | NDE1      | nudE neurodevelopment protein 1                                                           | 52.6  | 39.7  | 78.6   | 40.2  | 66.9   | 46.0  |
| <b>XLOC_006899</b> | MAD1L1    | MAD1 mitotic arrest deficient-like 1 (yeast)                                              | 85.6  | 14.0  | 42.6   | 15.1  | 15.7   | 14.6  |
| <b>XLOC_006952</b> | CCNB2     | cyclin B2                                                                                 | 776.6 | 340.3 | 1362.7 | 245.4 | 1156.6 | 304.9 |
| <b>XLOC_007310</b> | PRKACB    | "protein kinase, cAMP-dependent, catalytic, beta"                                         | 57.0  | 53.3  | 41.6   | 57.6  | 54.4   | 62.4  |
| <b>XLOC_007458</b> | PGR       | progesterone receptor                                                                     | 11.6  | 26.5  | 10.4   | 30.9  | 20.9   | 30.0  |
| <b>XLOC_008120</b> | CEP95     | centrosomal protein 95kDa                                                                 | 17.7  | 8.6   | 16.4   | 8.1   | 15.5   | 8.8   |
| <b>XLOC_009069</b> | GNAI1     | "guanine nucleotide binding protein (G protein), alpha inhibiting activity polypeptide 1" | 26.6  | 49.9  | 22.5   | 59.7  | 23.4   | 58.9  |
| <b>XLOC_009350</b> | PRKX      | "protein kinase, X-linked"                                                                | 1.9   | 2.0   | 1.0    | 2.5   | 1.1    | 2.3   |
| <b>XLOC_009448</b> | TNRC6B    | trinucleotide repeat containing 6B                                                        | 8.4   | 5.0   | 7.9    | 4.7   | 6.6    | 4.2   |
| <b>XLOC_009460</b> | IGF1      | insulin-like growth factor 1 (somatomedin C)                                              | 0.2   | 3.4   | 0.1    | 3.3   | 0.7    | 3.4   |
| <b>XLOC_010127</b> | IGF1R     | insulin-like growth factor 1 receptor                                                     | 9.1   | 7.9   | 8.2    | 9.6   | 14.1   | 7.8   |
| <b>XLOC_010176</b> | ADCY2     | adenylate cyclase 2 (brain)                                                               | 1.5   | 3.0   | 1.5    | 3.0   | 2.7    | 4.3   |
| <b>XLOC_010698</b> | CEP83     | centrosomal protein 83kDa                                                                 | 55.1  | 22.2  | 41.9   | 25.2  | 28.1   | 29.6  |
| <b>XLOC_010924</b> | ANAPC2    | anaphase promoting complex subunit 2                                                      | 47.2  | 32.5  | 37.6   | 40.0  | 25.0   | 33.7  |
| <b>XLOC_011020</b> | AKT1      | v-akt murine thymoma viral oncogene homolog 1                                             | 21.5  | 32.7  | 20.1   | 43.0  | 16.7   | 36.6  |
| <b>XLOC_011737</b> | RPS6KA3   | "ribosomal protein S6 kinase, 90kDa, polypeptide 3"                                       | 6.8   | 12.9  | 7.6    | 19.8  | 18.5   | 15.1  |
| <b>XLOC_011856</b> | SLMAP     | sarcolemma associated protein                                                             | 35.8  | 26.6  | 32.7   | 27.4  | 41.9   | 27.4  |
| <b>XLOC_012026</b> | ADCY3     | adenylate cyclase 3                                                                       | 0.1   | 1.9   | 0.1    | 1.3   | 0.1    | 1.5   |
| <b>XLOC_012226</b> | KRAS      | Kirsten rat sarcoma viral oncogene homolog                                                | 12.7  | 10.0  | 8.0    | 11.0  | 14.9   | 13.0  |
| <b>XLOC_012627</b> | MAD2L1    | MAD2 mitotic arrest deficient-like 1 (yeast)                                              | 237.4 | 127.2 | 352.4  | 107.3 | 396.7  | 183.8 |
| <b>XLOC_012916</b> | RPS6KL1   | ribosomal protein S6 kinase-like 1                                                        | 3.2   | 6.3   | 3.9    | 6.9   | 2.5    | 5.7   |
| <b>XLOC_013015</b> | PLEKHA1   | "pleckstrin homology domain containing, family A (phosphoinositide binding specific)      | 17.1  | 26.1  | 26.5   | 29.5  | 28.3   | 25.5  |

|                    |           |                                                                           |       |       |        |       |        |       |  |
|--------------------|-----------|---------------------------------------------------------------------------|-------|-------|--------|-------|--------|-------|--|
|                    |           | member 1"                                                                 |       |       |        |       |        |       |  |
| <b>XLOC_013151</b> | MOS       | v-mos Moloney murine sarcoma viral oncogene homolog                       | 1811. | 2874. | 1753.2 | 4117. | 1802.1 | 3505. |  |
|                    |           |                                                                           | 8     | 0     |        | 5     |        | 0     |  |
| <b>XLOC_013352</b> | ANAPC13   | anaphase promoting complex subunit 13                                     | 53.2  | 33.6  | 42.3   | 33.9  | 41.8   | 47.1  |  |
| <b>XLOC_013492</b> | CEP70     | centrosomal protein 70kDa                                                 | 85.5  | 36.3  | 86.3   | 44.0  | 63.1   | 29.3  |  |
| <b>XLOC_013619</b> | RPS6KA2   | "ribosomal protein S6 kinase, 90kDa, polypeptide 2"                       | 0.6   | 0.4   | 0.2    | 0.4   | 0.3    | 0.5   |  |
| <b>XLOC_013749</b> | ADCY7     | adenylate cyclase 7                                                       | 9.9   | 10.0  | 7.5    | 9.9   | 6.4    | 10.5  |  |
| <b>XLOC_014312</b> | RAF1      | "Raf-1 proto-oncogene, serinethreonine kinase"                            | 47.6  | 54.8  | 69.9   | 50.3  | 75.6   | 51.9  |  |
| <b>XLOC_014387</b> | MAD2L2    | MAD2 mitotic arrest deficient-like 2 (yeast)                              | 156.5 | 93.9  | 195.9  | 93.5  | 166.9  | 118.5 |  |
| <b>XLOC_014516</b> | PIK3CB    | "phosphatidylinositol-4,5-bisphosphate 3-kinase, catalytic subunit beta"  | 22.5  | 6.8   | 7.0    | 8.7   | 5.6    | 8.9   |  |
| <b>XLOC_014741</b> | LOC106040 | mitogen-activated protein kinase 11-like                                  | 90.8  | 41.1  | 97.3   | 30.4  | 67.8   | 25.7  |  |
|                    | 490       |                                                                           |       |       |        |       |        |       |  |
| <b>XLOC_014742</b> | LOC106040 | mitogen-activated protein kinase 12-like                                  | 0.8   | 2.5   | 0.5    | 2.2   | 0.9    | 2.4   |  |
|                    | 461       |                                                                           |       |       |        |       |        |       |  |
| <b>XLOC_014835</b> | ERC2      | ELKSRAB6-interactingCAST family member 2                                  | 7.1   | 1.6   | 5.4    | 1.7   | 2.8    | 1.0   |  |
| <b>XLOC_015731</b> | SYCP1     | synaptonemal complex protein 1                                            | 2.0   | 0.5   | 1.3    | 0.9   | 0.9    | 0.4   |  |
| <b>XLOC_016355</b> | MAPK10    | mitogen-activated protein kinase 10                                       | 0.1   | 0.2   | 0.4    | 0.7   | 0.2    | 0.3   |  |
| <b>XLOC_016479</b> | PIK3CG    | "phosphatidylinositol-4,5-bisphosphate 3-kinase, catalytic subunit gamma" | 2.1   | 3.3   | 1.4    | 3.1   | 3.3    | 3.1   |  |
| <b>XLOC_016575</b> | PIK3R1    | "phosphoinositide-3-kinase, regulatory subunit 1 (alpha)"                 | 2.6   | 8.1   | 1.6    | 12.6  | 6.4    | 9.6   |  |
| <b>XLOC_016578</b> | CCNB1     | cyclin B1                                                                 | 9238. | 4021. | 10301. | 3518. | 10332. | 3710. |  |
|                    |           |                                                                           | 8     | 8     | 2      | 2     | 4      | 6     |  |
| <b>XLOC_016786</b> | ANAPC1    | anaphase promoting complex subunit 1                                      | 160.6 | 52.7  | 94.1   | 44.1  | 66.0   | 50.1  |  |
| <b>XLOC_017026</b> | CCNA2     | cyclin A2                                                                 | 45.8  | 27.0  | 59.5   | 25.0  | 61.8   | 43.4  |  |
| <b>XLOC_017196</b> | INS       | insulin                                                                   |       |       | 0.2    | 0.0   |        |       |  |
| <b>XLOC_017198</b> | IGF2      | insulin-like growth factor 2                                              | 55.1  | 66.1  | 48.9   | 64.9  | 32.4   | 89.0  |  |
| <b>XLOC_017387</b> | CPEB4     | cytoplasmic polyadenylation element binding protein 4                     | 43.7  | 15.6  | 33.6   | 13.1  | 28.1   | 13.3  |  |

|                    |           |                                                                           |       |       |       |       |       |       |
|--------------------|-----------|---------------------------------------------------------------------------|-------|-------|-------|-------|-------|-------|
| <b>XLOC_017450</b> | LOC106042 | guanine nucleotide-binding protein G(i) subunit alpha-2<br>860            | 201.3 | 242.6 | 136.3 | 299.1 | 88.6  | 276.3 |
| <b>XLOC_017666</b> | RPS6KA6   | "ribosomal protein S6 kinase, 90kDa, polypeptide 6"                       | 6.6   | 4.8   | 7.1   | 5.0   | 10.0  | 4.4   |
| <b>XLOC_017810</b> | SPDYA     | speedyRINGO cell cycle regulator family member A                          | 10.4  | 3.4   | 8.0   | 3.3   | 6.5   | 3.0   |
| <b>XLOC_017902</b> | CCNA1     | cyclin A1                                                                 | 515.0 | 142.6 | 480.0 | 95.7  | 327.5 | 101.3 |
| <b>XLOC_018213</b> | IFT80     | intraflagellar transport 80                                               | 81.3  | 46.5  | 56.2  | 70.5  | 53.8  | 68.9  |
| <b>XLOC_018405</b> | MAP2K1    | mitogen-activated protein kinase kinase 1                                 | 35.4  | 37.6  | 64.8  | 37.1  | 104.0 | 44.5  |
| <b>XLOC_018447</b> | MAP2K1    | mitogen-activated protein kinase kinase 1                                 | 191.0 | 132.2 | 295.0 | 158.2 | 205.6 | 156.9 |
| <b>XLOC_018627</b> | KSR1      | kinase suppressor of ras 1                                                | 39.3  | 19.5  | 44.8  | 18.4  | 26.6  | 13.5  |
| <b>XLOC_019244</b> | PIK3CD    | "phosphatidylinositol-4,5-bisphosphate 3-kinase, catalytic subunit delta" | 1.8   | 2.8   | 1.1   | 3.3   | 1.3   | 2.4   |
| <b>XLOC_020387</b> | TOX3      | TOX high mobility group box family member 3                               | 2.4   | 0.9   | 1.7   | 0.4   | 0.6   | 0.5   |
| <b>XLOC_020457</b> | TBCK      | TBC1 domain containing kinase                                             | 20.8  | 13.5  | 32.7  | 10.3  | 47.1  | 12.2  |
| <b>XLOC_020693</b> | KSR2      | kinase suppressor of ras 2                                                | 0.0   | 0.0   | 0.1   | 0.1   | 0.1   | 0.1   |
| <b>XLOC_020821</b> | FZR1      | fizzycell division cycle 20 related 1                                     | 31.8  | 20.7  | 32.2  | 21.6  | 18.8  | 18.6  |
| <b>XLOC_021144</b> | CDC27     | cell division cycle 27                                                    | 50.5  | 31.1  | 69.5  | 35.3  | 59.0  | 29.9  |
| <b>XLOC_021196</b> | PLK1      | polo-like kinase 1                                                        | 118.4 | 62.1  | 151.6 | 51.2  | 99.6  | 68.3  |
| <b>XLOC_021324</b> | MAPK14    | mitogen-activated protein kinase 14                                       | 119.7 | 67.5  | 138.1 | 64.8  | 109.7 | 62.4  |
| <b>XLOC_021325</b> | MAPK13    | mitogen-activated protein kinase 13                                       | 0.8   | 0.8   | 1.5   | 0.7   | 1.0   | 0.5   |
| <b>XLOC_021578</b> | ADCY8     | adenylate cyclase 8 (brain)                                               | 0.6   | 1.1   | 0.3   | 1.0   | 0.3   | 1.0   |
| <b>XLOC_021684</b> | CDC16     | cell division cycle 16                                                    | 37.7  | 20.2  | 36.4  | 23.8  | 37.3  | 25.6  |
| <b>XLOC_021702</b> | ADCY1     | adenylate cyclase 1 (brain)                                               | 0.1   | 0.0   | 0.0   | 0.0   |       |       |
| <b>XLOC_021703</b> | LOC106046 | uncharacterized LOC106046456<br>456                                       | 30.9  | 13.0  | 45.7  | 6.7   | 24.9  | 4.3   |
| <b>XLOC_021977</b> | PIK3R5    | "phosphoinositide-3-kinase, regulatory subunit 5"                         | 2.3   | 2.9   | 2.7   | 4.1   | 1.3   | 3.4   |
| <b>XLOC_022311</b> | HSP90AA1  | "heat shock protein 90kDa alpha (cytosolic), class A member 1"            | 1017. | 759.3 | 972.2 | 780.5 | 935.0 | 1066. |
|                    |           |                                                                           | 5     |       |       |       |       | 1     |

|                    |                  |                                                                                           |       |       |       |       |       |       |
|--------------------|------------------|-------------------------------------------------------------------------------------------|-------|-------|-------|-------|-------|-------|
| <b>XLOC_022817</b> | CPEB1            | cytoplasmic polyadenylation element binding protein 1                                     | 53.8  | 10.7  | 37.4  | 16.1  | 16.9  | 8.1   |
| <b>XLOC_023338</b> | RPS6KA1          | "ribosomal protein S6 kinase, 90kDa, polypeptide 1"                                       | 52.3  | 31.9  | 49.7  | 32.4  | 33.3  | 27.4  |
| <b>XLOC_024071</b> | STOML2           | stomatin (EPB72)-like 2                                                                   | 87.1  | 78.6  | 109.0 | 80.2  | 74.0  | 80.9  |
| <b>XLOC_024137</b> | DLC1             | DLC1 Rho GTPase activating protein                                                        | 9.3   | 19.9  | 8.6   | 17.4  | 7.4   | 19.1  |
| <b>XLOC_025259</b> | CCNB3            | cyclin B3                                                                                 | 33.7  | 31.0  | 38.1  | 30.9  | 23.1  | 43.0  |
| <b>XLOC_025377</b> | LOC106049<br>631 | RAC-beta serinethreonine-protein kinase-like                                              | 62.7  | 100.7 | 79.6  | 101.0 | 57.7  | 100.0 |
| <b>XLOC_025534</b> | GNAI3            | "guanine nucleotide binding protein (G protein), alpha inhibiting activity polypeptide 3" | 276.3 | 173.6 | 235.3 | 193.0 | 204.8 | 221.1 |
| <b>XLOC_025595</b> | SPDYC            | speedyRINGO cell cycle regulator family member C                                          | 10.2  | 2.8   | 11.7  | 2.8   | 3.5   | 1.8   |

Table S5 Differentially expressed GnRH-related genes during the period between egg-laying and broody goose follicles

|                     |                                                                       | LSWF  | BSWF  | LLWF  | BLWF  | LSYF  | BSYF  |
|---------------------|-----------------------------------------------------------------------|-------|-------|-------|-------|-------|-------|
| <b>GNAS</b>         | GNAS complex locus                                                    | 156.7 | 86.2  | 197.6 | 74.1  | 133.4 | 67.6  |
| <b>LOC106042961</b> | cytosolic phospholipase A2 epsilon-like                               | 0.8   | 0.1   | 0.7   | 0.1   | 0.7   | 0.1   |
| <b>ADCY5</b>        | adenylate cyclase 5                                                   | 1.6   | 4.4   | 1.4   | 4.5   | 2.5   | 5.1   |
| <b>CACNA1C</b>      | "calcium channel, voltage-dependent, L type, alpha 1C subunit"        | 1.0   | 5.1   | 0.7   | 4.5   | 2.0   | 5.0   |
| <b>LRR8D</b>        | "leucine rich repeat containing 8 family, member D"                   | 24.6  | 11.9  | 20.8  | 12.1  | 15.7  | 9.7   |
| <b>ATF4</b>         | activating transcription factor 4                                     | 144.2 | 317.7 | 159.2 | 335.8 | 152.3 | 354.7 |
| <b>LOC106036842</b> | mitogen-activated protein kinase kinase kinase 3-like                 | 3.3   | 14.7  | 2.2   | 15.9  | 1.8   | 13.6  |
| <b>LOC106038708</b> | "calmodulin, striated muscle"                                         | 0.7   | 2.5   | 0.6   | 2.4   | 0.3   | 2.1   |
| <b>LOC106040490</b> | mitogen-activated protein kinase 11-like                              | 90.8  | 41.1  | 97.3  | 30.4  | 67.8  | 25.7  |
| <b>LOC106040461</b> | mitogen-activated protein kinase 12-like                              | 0.8   | 2.5   | 0.5   | 2.2   | 0.9   | 2.4   |
| <b>MMP2</b>         | matrix metalloproteinase 2                                            | 19.2  | 252.1 | 6.4   | 287.8 | 17.5  | 268.0 |
| <b>KSR1</b>         | kinase suppressor of ras 1                                            | 39.3  | 19.5  | 44.8  | 18.4  | 26.6  | 13.5  |
| <b>MAP3K3</b>       | mitogen-activated protein kinase kinase kinase 3                      | 9.0   | 22.8  | 9.3   | 26.7  | 7.0   | 21.4  |
| <b>ITPR3</b>        | "inositol 1,4,5-trisphosphate receptor, type 3"                       | 2.2   | 8.7   | 1.6   | 7.2   | 1.7   | 9.5   |
| <b>MAPK14</b>       | mitogen-activated protein kinase 14                                   | 119.7 | 67.5  | 138.1 | 64.8  | 109.7 | 62.4  |
| <b>LOC106046456</b> | uncharacterized LOC106046456                                          | 30.9  | 13.0  | 45.7  | 6.7   | 24.9  | 4.3   |
| <b>GNA11</b>        | "guanine nucleotide binding protein (G protein), alpha 11 (Gq class)" | 8.8   | 18.1  | 11.0  | 19.7  | 13.1  | 21.8  |
| <b>LOC106049938</b> | son of sevenless homolog 2-like                                       | 58.8  | 25.5  | 59.7  | 26.5  | 48.7  | 21.7  |

Table S6 Differentially expressed steroid-related genes during the period between egg-laying and broody goose follicles

| gene_id            |              |                                                                             | LSWF  | BSWF   | LLWF  | BLWF   | LSYF  | BSYF   |
|--------------------|--------------|-----------------------------------------------------------------------------|-------|--------|-------|--------|-------|--------|
| <b>XLOC_001587</b> | NR1H3        | "nuclear receptor subfamily 1, group H, member 3"                           | 24.9  | 68.9   | 17.6  | 72.8   | 23.8  | 70.2   |
| <b>XLOC_003012</b> | NR1D2        | "nuclear receptor subfamily 1, group D, member 2"                           | 17.0  | 30.9   | 11.6  | 31.3   | 13.7  | 30.5   |
| <b>XLOC_004062</b> | AKR1D1       | "aldo-keto reductase family 1, member D1"                                   | 563.8 | 109.3  | 449.9 | 134.0  | 235.5 | 61.1   |
| <b>XLOC_004710</b> | ACBD3        | acyl-CoA binding domain containing 3                                        | 58.1  | 30.9   | 68.2  | 29.8   | 57.9  | 31.8   |
| <b>XLOC_005049</b> | LOC106031836 | "steroid 17-alpha-hydroxylase17,20 lyase"                                   | 39.1  | 1317.9 | 13.5  | 1090.7 | 69.6  | 1505.8 |
| <b>XLOC_005914</b> | NR3C1        | "nuclear receptor subfamily 3, group C, member 1 (glucocorticoid receptor)" | 9.8   | 22.9   | 9.2   | 25.4   | 12.9  | 24.5   |
| <b>XLOC_007458</b> | PGR          | progesterone receptor                                                       | 11.6  | 26.5   | 10.4  | 30.9   | 20.9  | 30.0   |
| <b>XLOC_010065</b> | NR2F2        | "nuclear receptor subfamily 2, group F, member 2"                           | 10.5  | 97.9   | 6.7   | 106.5  | 15.9  | 119.6  |
| <b>XLOC_012119</b> | PAQR8        | progesterin and adipoQ receptor family member VIII                          | 0.4   | 1.1    | 0.4   | 1.5    | 0.5   | 1.5    |
| <b>XLOC_014279</b> | PPARG        | peroxisome proliferator-activated receptor gamma                            | 4.9   | 13.3   | 4.0   | 25.5   | 9.4   | 23.1   |
| <b>XLOC_016054</b> | LOC106041605 | pre-B-cell leukemia transcription factor 1                                  | 7.8   | 23.6   | 8.1   | 30.1   | 9.7   | 27.0   |
| <b>XLOC_016464</b> | NR5A2        | "nuclear receptor subfamily 5, group A, member 2"                           | 0.2   | 1.5    | 0.1   | 25.9   | 0.3   | 8.8    |
| <b>XLOC_017990</b> | NR0B1        | "nuclear receptor subfamily 0, group B, member 1"                           | 59.2  | 142.2  | 49.3  | 139.9  | 71.1  | 125.1  |
| <b>XLOC_019017</b> | RXRA         | "retinoid X receptor, alpha"                                                | 1.2   | 7.0    | 1.1   | 7.7    | 1.2   | 6.1    |
| <b>XLOC_019156</b> | LOC106044184 | "cholesterol side-chain cleavage enzyme, mitochondrial"                     | 15.6  | 442.1  | 5.1   | 645.1  | 18.3  | 474.2  |
| <b>XLOC_019349</b> | STAR         | steroidogenic acute regulatory protein                                      | 22.6  | 167.8  | 16.4  | 156.2  | 53.3  | 203.8  |
| <b>XLOC_020869</b> | LOC106045741 | 3 beta-hydroxysteroid dehydrogenaseDelta 5--4-isomerase-like                | 12.9  | 91.1   | 9.5   | 304.2  | 23.8  | 125.0  |
| <b>XLOC_022900</b> | NSDHL        | NAD(P) dependent steroid dehydrogenase-like                                 | 68.1  | 34.3   | 80.9  | 35.4   | 65.9  | 31.3   |
| <b>XLOC_023486</b> | LOC106047991 | signal transducer and activator of transcription 5A-like                    | 13.4  | 26.4   | 11.6  | 32.1   | 10.8  | 27.5   |

Table S7 Differentially expressed transcription factors during the period between egg-laying and broody goose follicles

| gene_id     |          |                                                                         | LSWF | BSWF  | LLWF | BLWF  | LSYF | BSYF  |
|-------------|----------|-------------------------------------------------------------------------|------|-------|------|-------|------|-------|
| XLOC_000018 | TLX1     | T-cell leukemia homeobox 1                                              | 0.3  | 0.1   | 0.4  | 0.0   | 0.1  | 0.0   |
| XLOC_000056 | VENTX    | VENT homeobox                                                           | 0.8  | 0.5   | 1.3  | 0.5   | 1.0  | 0.3   |
| XLOC_000068 | HHEX     | hematopoietically expressed homeobox                                    | 1.3  | 6.1   | 0.5  | 5.8   | 1.7  | 6.1   |
| XLOC_000103 | DRGX     | dorsal root ganglia homeobox                                            | 0.1  | 1.5   | 0.7  | 3.2   | 7.9  | 5.3   |
| XLOC_000123 | PAX2     | paired box 2                                                            | 0.0  | 0.0   |      |       | 0.0  | 0.0   |
| XLOC_000127 | PITX3    | paired-like homeodomain 3                                               | 0.4  | 0.1   | 0.9  | 0.3   | 0.2  | 0.1   |
| XLOC_000357 | MAPK8    | mitogen-activated protein kinase 8                                      | 15.0 | 8.6   | 14.8 | 8.6   | 14.9 | 8.2   |
| XLOC_000382 | PITX3    | paired-like homeodomain 3                                               | 0.5  | 0.2   | 1.2  | 0.4   | 0.1  | 0.1   |
| XLOC_000395 | ADAM8    | ADAM metalloproteinase domain 8                                         | 2.8  | 3.0   | 0.3  | 2.4   | 0.6  | 2.5   |
| XLOC_000459 | SIRT1    | sirtuin 1                                                               | 24.2 | 18.8  | 16.6 | 18.0  | 20.0 | 18.9  |
| XLOC_000477 | ARID5B   | AT rich interactive domain 5B (MRF1-like)                               | 6.5  | 8.9   | 5.6  | 9.2   | 3.8  | 7.5   |
| XLOC_000554 | KAT6B    | K(lysine) acetyltransferase 6B                                          | 8.7  | 5.7   | 11.0 | 8.5   | 12.4 | 5.6   |
| XLOC_000574 | FOXI3    | forkhead box I3                                                         | 0.3  | 0.0   | 0.0  | 0.0   | 0.1  | 0.0   |
| XLOC_000616 | HTT      | huntingtin                                                              | 9.1  | 8.4   | 11.9 | 8.4   | 12.0 | 8.2   |
| XLOC_000708 | RBPJ     | recombination signal binding protein for immunoglobulin kappa J region  | 15.6 | 19.2  | 21.0 | 25.9  | 69.2 | 28.3  |
| XLOC_000749 | GSC      | goosecoid homeobox                                                      | 0.1  | 0.8   | 0.1  | 0.8   | 0.2  | 0.6   |
| XLOC_000790 | FOXP3    | forkhead box P3                                                         | 14.0 | 12.3  | 10.2 | 12.4  | 15.4 | 12.2  |
| XLOC_000835 | CTBP1    | C-terminal binding protein 1                                            | 65.3 | 151.7 | 80.6 | 207.1 | 85.8 | 218.2 |
| XLOC_000888 | WFS1     | Wolfram syndrome 1 (wolframin)                                          | 72.1 | 46.8  | 83.2 | 47.8  | 81.7 | 36.0  |
| XLOC_000892 | MSX1     | msh homeobox 1                                                          | 14.6 | 7.6   | 19.6 | 20.9  | 21.6 | 24.4  |
| XLOC_000944 | PPARGC1A | "peroxisome proliferator-activated receptor gamma, coactivator 1 alpha" | 2.7  | 0.8   | 2.7  | 0.9   | 2.0  | 0.5   |

|                    |              |                                                                               |       |      |       |      |       |      |
|--------------------|--------------|-------------------------------------------------------------------------------|-------|------|-------|------|-------|------|
| <b>XLOC_000962</b> | YY1          | YY1 transcription factor                                                      | 11.1  | 21.8 | 12.9  | 19.8 | 24.2  | 22.7 |
| <b>XLOC_001037</b> | LOC106037022 | glycogen synthase kinase-3 beta-like                                          | 153.3 | 26.6 | 42.6  | 41.4 | 35.2  | 37.9 |
| <b>XLOC_001197</b> | POU1F1       | POU class 1 homeobox 1                                                        | 0.0   | 0.0  | 0.1   | 0.0  |       |      |
| <b>XLOC_001277</b> | LOC106037987 | group 10 secretory phospholipase A2-like                                      | 0.3   | 0.0  | 0.0   | 0.0  | 0.0   | 0.0  |
| <b>XLOC_001290</b> | BLZF1        | basic leucine zipper nuclear factor 1                                         | 126.1 | 51.0 | 98.9  | 53.0 | 82.3  | 56.4 |
| <b>XLOC_001356</b> | LOC106039760 | "POU domain, class 2, transcription factor 1"                                 | 5.1   | 2.6  | 7.5   | 3.1  | 4.8   | 2.0  |
| <b>XLOC_001462</b> | TSHZ2        | teashirt zinc finger homeobox 2                                               | 6.2   | 6.3  | 7.2   | 9.1  | 9.8   | 6.4  |
| <b>XLOC_001483</b> | TFAP2C       | transcription factor AP-2 gamma (activating enhancer binding protein 2 gamma) | 0.5   | 0.2  | 0.2   | 0.2  | 0.1   | 0.1  |
| <b>XLOC_001579</b> | CREB3L1      | cAMP responsive element binding protein 3-like 1                              | 6.2   | 44.9 | 12.0  | 55.2 | 16.0  | 53.6 |
| <b>XLOC_001587</b> | NR1H3        | "nuclear receptor subfamily 1, group H, member 3"                             | 24.9  | 68.9 | 17.6  | 72.8 | 23.8  | 70.2 |
| <b>XLOC_001632</b> | ELF5         | E74-like factor 5 (ets domain transcription factor)                           | 0.0   | 0.0  | 0.1   | 0.0  | 0.1   | 0.0  |
| <b>XLOC_001666</b> | RBPJL        | recombination signal binding protein for immunoglobulin kappa J region-like   | 0.3   | 0.9  | 0.1   | 1.4  | 0.9   | 1.2  |
| <b>XLOC_001675</b> | HNF4A        | "hepatocyte nuclear factor 4, alpha"                                          | 0.0   | 0.1  | 0.0   | 0.1  | 0.0   | 0.1  |
| <b>XLOC_001711</b> | ADNP         | activity-dependent neuroprotector homeobox                                    | 28.4  | 25.7 | 23.6  | 26.1 | 25.2  | 25.3 |
| <b>XLOC_001720</b> | SALL4        | spalt-like transcription factor 4                                             | 19.0  | 4.7  | 20.4  | 8.4  | 6.7   | 2.7  |
| <b>XLOC_001731</b> | ZNF217       | zinc finger protein 217                                                       | 17.6  | 16.7 | 24.4  | 17.9 | 24.9  | 13.4 |
| <b>XLOC_001800</b> | MGA          | "MGA, MAX dimerization protein"                                               | 3.7   | 4.3  | 2.6   | 3.9  | 3.1   | 3.4  |
| <b>XLOC_001838</b> | SPI1         | Spi-1 proto-oncogene                                                          | 14.3  | 14.5 | 5.1   | 22.0 | 8.0   | 18.7 |
| <b>XLOC_001961</b> | PHF5A        | PHD finger protein 5A                                                         | 134.6 | 70.9 | 132.7 | 71.6 | 114.0 | 85.9 |
| <b>XLOC_001981</b> | E2F7         | E2F transcription factor 7                                                    | 3.0   | 1.5  | 2.6   | 1.6  | 1.8   | 1.7  |
| <b>XLOC_002064</b> | DBX2         | developing brain homeobox 2                                                   | 0.3   | 0.2  | 0.4   | 0.1  | 0.4   | 0.2  |
| <b>XLOC_002139</b> | TEF          | thyrotrophic embryonic factor                                                 | 12.1  | 31.4 | 12.6  | 26.7 | 17.8  | 34.5 |
| <b>XLOC_002186</b> | YEATS4       | YEATS domain containing 4                                                     | 135.2 | 53.2 | 89.7  | 61.0 | 77.6  | 64.2 |
| <b>XLOC_002205</b> | HMGA2        | high mobility group AT-hook 2                                                 | 3.7   | 2.7  | 6.3   | 2.6  | 19.2  | 2.6  |
| <b>XLOC_002323</b> | ZBTB18       | zinc finger and BTB domain containing 18                                      | 4.0   | 5.3  | 3.4   | 6.5  | 3.8   | 5.1  |
| <b>XLOC_002407</b> | FOSL2        | FOS-like antigen 2                                                            | 6.8   | 12.2 | 3.2   | 13.6 | 4.0   | 9.6  |



|                    |         |                                                                                         |      |      |      |      |      |      |
|--------------------|---------|-----------------------------------------------------------------------------------------|------|------|------|------|------|------|
| <b>XLOC_002424</b> | SIX2    | SIX homeobox 2                                                                          | 0.1  | 0.2  | 0.0  | 0.3  | 0.0  | 0.4  |
| <b>XLOC_002432</b> | EGLN1   | egl-9 family hypoxia-inducible factor 1                                                 | 18.7 | 38.0 | 19.9 | 40.5 | 30.2 | 40.4 |
| <b>XLOC_002533</b> | NFKBIE  | "nuclear factor of kappa light polypeptide gene enhancer in B-cells inhibitor, epsilon" | 8.0  | 13.2 | 4.7  | 14.4 | 3.2  | 13.5 |
| <b>XLOC_002573</b> | EPAS1   | endothelial PAS domain protein 1                                                        | 58.3 | 66.9 | 67.0 | 60.8 | 49.2 | 66.8 |
| <b>XLOC_002584</b> | GLI2    | GLI family zinc finger 2                                                                | 2.6  | 10.6 | 1.7  | 9.6  | 1.7  | 10.1 |
| <b>XLOC_002624</b> | TBR1    | "T-box, brain, 1"                                                                       | 1.3  | 0.7  | 2.6  | 0.7  | 0.5  | 0.2  |
| <b>XLOC_002637</b> | CSRNP3  | cysteine-serine-rich nuclear protein 3                                                  | 1.7  | 0.4  | 1.8  | 0.6  | 1.5  | 0.3  |
| <b>XLOC_002647</b> | CERS6   | ceramide synthase 6                                                                     | 1.3  | 1.8  | 1.2  | 1.9  | 1.3  | 2.2  |
| <b>XLOC_002672</b> | DLX1    | distal-less homeobox 1                                                                  | 0.4  | 0.4  | 0.1  | 0.2  | 0.0  | 0.2  |
|                    | HOXD12  | homeobox D12                                                                            |      |      | 0.0  | 0.0  |      |      |
| <b>XLOC_002690</b> | HOXD11  | homeobox D11                                                                            | 0.0  | 0.5  | 0.0  | 0.2  | 2.0  | 0.6  |
| <b>XLOC_002693</b> | HOXD9   | homeobox D9                                                                             | 1.0  | 1.0  | 0.4  | 2.3  | 1.7  | 3.4  |
| <b>XLOC_002694</b> | HOXD8   | homeobox D8                                                                             | 1.0  | 2.3  | 0.1  | 2.4  | 0.9  | 2.8  |
| <b>XLOC_002695</b> | HOXD4   | homeobox D4                                                                             | 0.1  | 0.3  | 0.0  | 0.0  | 0.1  | 0.1  |
| <b>XLOC_002741</b> | CREB1   | cAMP responsive element binding protein 1                                               | 5.0  | 7.7  | 3.6  | 8.6  | 7.4  | 9.5  |
| <b>XLOC_002767</b> | TFCP2L1 | transcription factor CP2-like 1                                                         | 5.7  | 3.3  | 7.2  | 3.3  | 5.9  | 1.5  |
| <b>XLOC_002881</b> | NFE2L2  | "nuclear factor, erythroid 2-like 2"                                                    | 44.2 | 47.4 | 32.5 | 55.0 | 39.5 | 49.9 |
| <b>XLOC_002913</b> | KLF7    | Kruppel-like factor 7 (ubiquitous)                                                      | 2.1  | 2.1  | 1.5  | 1.9  | 2.8  | 2.3  |
| <b>XLOC_002931</b> | DIP2A   | disco-interacting protein 2 homolog A                                                   | 11.6 | 12.7 | 11.0 | 12.2 | 13.9 | 12.7 |
| <b>XLOC_002942</b> | HDAC9   | histone deacetylase 9                                                                   | 3.7  | 4.9  | 4.7  | 5.0  | 7.2  | 4.1  |
| <b>XLOC_002986</b> | CREB5   | cAMP responsive element binding protein 5                                               | 0.6  | 0.8  | 1.3  | 0.6  | 1.0  | 0.5  |
| <b>XLOC_003004</b> | KAT2B   | K(lysine) acetyltransferase 2B                                                          | 5.9  | 10.9 | 6.9  | 12.2 | 7.5  | 13.0 |
| <b>XLOC_003015</b> | RARB    | "retinoic acid receptor, beta"                                                          | 19.4 | 25.2 | 12.7 | 32.5 | 9.3  | 24.8 |
| <b>XLOC_003058</b> | TWIST1  | twist family bHLH transcription factor 1                                                | 0.3  | 3.1  | 0.0  | 5.8  | 0.2  | 2.0  |
| <b>XLOC_003101</b> | HOXA1   | homeobox A1                                                                             | 14.5 | 6.5  | 15.9 | 4.6  | 9.2  | 3.7  |
| <b>XLOC_003102</b> | HOXA2   | homeobox A2                                                                             | 0.3  | 0.6  | 0.1  | 0.6  | 0.1  | 0.5  |

|                    |        |                                                                           |       |       |       |       |       |       |
|--------------------|--------|---------------------------------------------------------------------------|-------|-------|-------|-------|-------|-------|
| <b>XLOC_003104</b> | HOXA4  | homeobox A4                                                               | 3.8   | 3.6   | 3.8   | 2.5   | 3.1   | 2.4   |
| <b>XLOC_003105</b> | HOXA9  | homeobox A9                                                               | 2.1   | 4.2   | 1.6   | 2.9   | 6.3   | 4.1   |
| <b>XLOC_003106</b> | HOXA10 | homeobox A10                                                              | 5.3   | 1.6   | 0.5   | 0.1   | 8.9   | 3.5   |
| <b>XLOC_003107</b> | HOXA11 | homeobox A11                                                              | 0.0   | 0.0   |       |       | 0.3   | 0.0   |
| <b>XLOC_003149</b> | THRB   | "thyroid hormone receptor, beta"                                          | 0.7   | 2.0   | 0.2   | 2.9   | 0.5   | 2.1   |
| <b>XLOC_003151</b> | THRB   | "thyroid hormone receptor, beta"                                          | 1.5   | 0.1   | 1.7   | 0.0   | 0.4   | 0.1   |
| <b>XLOC_003170</b> | EOMES  | eomesodermin                                                              | 33.2  | 10.4  | 39.7  | 15.6  | 15.5  | 6.5   |
| <b>XLOC_003267</b> | GCM1   | glial cells missing homolog 1 (Drosophila)                                | 0.0   | 0.0   | 0.0   | 0.0   | 0.1   | 0.1   |
| <b>XLOC_003429</b> | NBN    | nibrin                                                                    | 13.9  | 9.3   | 16.4  | 9.2   | 12.9  | 8.9   |
| <b>XLOC_003443</b> | E2F5   | "E2F transcription factor 5, p130-binding"                                | 96.7  | 169.3 | 152.5 | 199.6 | 324.5 | 249.0 |
| <b>XLOC_003481</b> | MSC    | musculin                                                                  | 1.6   | 1.5   | 0.4   | 1.7   | 0.8   | 2.1   |
| <b>XLOC_003498</b> | COP55  | COP9 signalosome subunit 5                                                | 185.9 | 91.2  | 138.4 | 106.7 | 180.5 | 108.7 |
| <b>XLOC_003563</b> | E2F5   | "E2F transcription factor 5, p130-binding"                                | 47.3  | 36.3  | 63.2  | 28.7  | 65.1  | 26.1  |
| <b>XLOC_003590</b> | ZFHX4  | zinc finger homeobox 4                                                    | 0.6   | 1.1   | 0.5   | 0.9   | 0.6   | 0.9   |
| <b>XLOC_003594</b> | HNF4G  | "hepatocyte nuclear factor 4, gamma"                                      | 0.0   | 0.0   | 0.1   | 0.2   | 0.1   | 0.3   |
| <b>XLOC_003683</b> | MYCN   | v-myc avian myelocytomatosis viral oncogene neuroblastoma derived homolog | 5.5   | 3.3   | 1.9   | 4.6   | 2.7   | 4.4   |
| <b>XLOC_003723</b> | GSX2   | GS homeobox 2                                                             | 1.1   | 0.6   | 1.1   | 0.6   | 0.3   | 0.3   |
| <b>XLOC_003741</b> | MYT1L  | myelin transcription factor 1-like                                        | 0.1   | 0.1   | 0.1   | 0.0   | 0.0   | 0.0   |
| <b>XLOC_003768</b> | KLF11  | Kruppel-like factor 11                                                    | 2.6   | 24.3  | 0.9   | 25.0  | 2.9   | 22.7  |
| <b>XLOC_003778</b> | E2F6   | E2F transcription factor 6                                                | 20.8  | 7.9   | 16.1  | 6.6   | 15.7  | 5.7   |
| <b>XLOC_003817</b> | NFXL1  | "nuclear transcription factor, X-box binding-like 1"                      | 106.6 | 60.5  | 134.2 | 33.9  | 154.6 | 46.7  |
| <b>XLOC_003836</b> | CLOCK  | clock circadian regulator                                                 | 4.9   | 5.4   | 3.3   | 6.0   | 4.4   | 6.0   |
| <b>XLOC_003842</b> | ETV6   | ets variant 6                                                             | 13.8  | 16.9  | 10.3  | 18.6  | 11.7  | 18.7  |
| <b>XLOC_003846</b> | CREBL2 | cAMP responsive element binding protein-like 2                            | 47.6  | 36.4  | 44.1  | 35.2  | 37.6  | 28.7  |
| <b>XLOC_003887</b> | KDM5A  | lysine (K)-specific demethylase 5A                                        | 57.5  | 18.5  | 40.3  | 18.7  | 24.5  | 15.2  |
| <b>XLOC_003940</b> | SPIC   | Spi-C transcription factor (Spi-1PU.1 related)                            | 0.1   | 0.0   | 0.0   | 0.1   | 0.1   | 0.0   |

|                    |              |                                                                        |       |       |      |       |      |       |
|--------------------|--------------|------------------------------------------------------------------------|-------|-------|------|-------|------|-------|
| <b>XLOC_003947</b> | LRP6         | low density lipoprotein receptor-related protein 6                     | 3.2   | 5.8   | 2.5  | 5.3   | 4.1  | 5.3   |
| <b>XLOC_004020</b> | LOC106030952 | zinc finger protein 501-like                                           | 1.2   | 0.6   | 0.6  | 0.9   | 0.4  | 0.7   |
| <b>XLOC_004049</b> | CREB3L2      | cAMP responsive element binding protein 3-like 2                       | 41.8  | 43.9  | 43.0 | 52.6  | 56.4 | 45.1  |
| <b>XLOC_004073</b> | GNPTAB       | "N-acetylglucosamine-1-phosphate transferase, alpha and beta subunits" | 26.2  | 24.6  | 27.7 | 28.8  | 27.8 | 28.5  |
| <b>XLOC_004094</b> | FOXP4        | forkhead box N4                                                        | 1.4   | 0.9   | 1.5  | 0.7   | 0.6  | 1.1   |
| <b>XLOC_004105</b> | CMKLR1       | chemerin chemokine-like receptor 1                                     | 0.4   | 2.0   | 0.2  | 1.9   | 0.2  | 1.8   |
| <b>XLOC_004174</b> | PUS1         | pseudouridylate synthase 1                                             | 21.3  | 22.0  | 26.9 | 23.4  | 22.3 | 24.2  |
| <b>XLOC_004227</b> | LOC106031301 | T-box-containing protein TBX6L                                         | 2.4   | 2.0   | 2.8  | 1.0   | 2.3  | 1.3   |
| <b>XLOC_004244</b> | HNF1A        | HNF1 homeobox A                                                        | 1.3   | 1.1   | 1.0  | 0.8   | 1.5  | 0.6   |
| <b>XLOC_004245</b> | HNF1A        | HNF1 homeobox A                                                        | 0.4   | 0.9   | 0.7  | 0.5   | 1.4  | 0.4   |
| <b>XLOC_004258</b> | PLA2G1B      | "phospholipase A2, group IB (pancreas)"                                | 0.6   | 0.1   | 0.2  | 0.1   | 0.1  | 0.0   |
| <b>XLOC_004328</b> | CUX2         | cut-like homeobox 2                                                    | 2.3   | 2.7   | 1.6  | 2.6   | 1.0  | 2.7   |
| <b>XLOC_004338</b> | PSMD9        | "proteasome (prosome, macropain) 26S subunit, non-ATPase, 9"           | 42.0  | 37.7  | 39.8 | 38.7  | 29.6 | 41.8  |
| <b>XLOC_004409</b> | TBX1         | T-box 1                                                                | 1.3   | 1.3   | 1.4  | 1.8   | 0.8  | 1.2   |
| <b>XLOC_004456</b> | HNF1A        | HNF1 homeobox A                                                        | 0.3   | 0.1   | 0.2  | 0.2   | 0.3  | 0.2   |
|                    | LHX5         | LIM homeobox 5                                                         |       |       | 0.1  | 0.0   | 0.0  | 0.1   |
| <b>XLOC_004496</b> | TBX5         | T-box 5                                                                | 4.8   | 1.1   | 3.2  | 0.9   | 0.8  | 0.5   |
| <b>XLOC_004497</b> | TBX3         | T-box 3                                                                | 2.9   | 19.7  | 1.5  | 16.7  | 2.1  | 17.7  |
| <b>XLOC_004535</b> | TRERF1       | transcriptional regulating factor 1                                    | 38.3  | 18.8  | 25.5 | 18.7  | 19.1 | 18.9  |
| <b>XLOC_004549</b> | TRAF5        | TNF receptor-associated factor 5                                       | 1.7   | 1.8   | 1.0  | 2.5   | 1.4  | 2.4   |
| <b>XLOC_004634</b> | MTA3         | "metastasis associated 1 family, member 3"                             | 25.9  | 15.3  | 30.3 | 11.7  | 25.5 | 13.0  |
| <b>XLOC_004699</b> | CENPF        | "centromere protein F, 350400kDa"                                      | 20.7  | 5.1   | 14.4 | 4.1   | 14.5 | 7.2   |
| <b>XLOC_004707</b> | ATF3         | activating transcription factor 3                                      | 6.9   | 6.1   | 8.9  | 7.1   | 8.0  | 6.3   |
| <b>XLOC_004735</b> | ZFP36L1      | ZFP36 ring finger protein-like 1                                       | 117.5 | 180.8 | 46.8 | 209.6 | 36.3 | 165.8 |
| <b>XLOC_004757</b> | MEIS2        | Meis homeobox 2                                                        | 11.8  | 32.5  | 2.6  | 54.3  | 4.4  | 41.9  |
| <b>XLOC_004784</b> | FOXP1        | forkhead box G1                                                        | 0.3   | 0.0   | 0.3  | 0.1   | 0.1  | 0.1   |

|                    |              |                                                                                    |      |       |      |       |      |       |
|--------------------|--------------|------------------------------------------------------------------------------------|------|-------|------|-------|------|-------|
| <b>XLOC_004871</b> | PRKD1        | protein kinase D1                                                                  | 4.2  | 6.7   | 3.9  | 7.1   | 6.9  | 7.7   |
| <b>XLOC_004874</b> | STRN3        | "striatin, calmodulin binding protein 3"                                           | 52.9 | 32.3  | 36.9 | 37.8  | 33.6 | 40.2  |
| <b>XLOC_004890</b> | IRF7         | interferon regulatory factor 7                                                     | 2.2  | 6.0   | 1.2  | 7.0   | 1.3  | 6.9   |
| <b>XLOC_004933</b> | SUFU         | suppressor of fused homolog (Drosophila)                                           | 29.6 | 28.8  | 39.0 | 35.4  | 31.5 | 31.5  |
| <b>XLOC_004942</b> | TAF5         | "TAF5 RNA polymerase II, TATA box binding protein (TBP)-associated factor, 100kDa" | 13.0 | 11.9  | 12.9 | 12.0  | 12.6 | 12.9  |
| <b>XLOC_004943</b> | PDCD11       | programmed cell death 11                                                           | 17.1 | 10.9  | 21.1 | 12.3  | 17.4 | 13.0  |
| <b>XLOC_005051</b> | PCGF6        | polycomb group ring finger 6                                                       | 6.5  | 6.3   | 6.0  | 5.8   | 10.0 | 5.9   |
| <b>XLOC_005137</b> | ZNF639       | zinc finger protein 639                                                            | 77.0 | 21.4  | 31.8 | 22.3  | 42.6 | 23.5  |
| <b>XLOC_005187</b> | FOXK1        | forkhead box K1                                                                    | 12.6 | 8.5   | 9.7  | 9.2   | 5.3  | 7.9   |
| <b>XLOC_005223</b> | LOC106032117 | chemokine-like receptor 1                                                          | 1.9  | 1.3   | 2.5  | 1.0   | 1.2  | 0.7   |
| <b>XLOC_005331</b> | CARD11       | "caspase recruitment domain family, member 11"                                     | 1.6  | 1.8   | 0.9  | 2.2   | 1.1  | 1.9   |
| <b>XLOC_005407</b> | SMAD1        | SMAD family member 1                                                               | 15.4 | 32.4  | 15.7 | 39.3  | 21.0 | 32.2  |
| <b>XLOC_005412</b> | POU4F2       | POU class 4 homeobox 2                                                             | 1.2  | 0.2   | 1.2  | 0.1   | 0.7  | 0.5   |
| <b>XLOC_005510</b> | NR3C2        | "nuclear receptor subfamily 3, group C, member 2"                                  | 10.5 | 6.1   | 12.1 | 5.5   | 8.9  | 4.5   |
| <b>XLOC_005584</b> | HSF2         | heat shock transcription factor 2                                                  | 49.8 | 41.0  | 55.8 | 37.0  | 60.3 | 39.5  |
| <b>XLOC_005601</b> | HEY2         | hes-related family bHLH transcription factor with YRPW motif 2                     | 46.3 | 20.4  | 58.4 | 16.7  | 46.6 | 16.4  |
| <b>XLOC_005638</b> | TCF21        | transcription factor 21                                                            | 2.1  | 158.4 | 1.3  | 191.6 | 4.7  | 221.5 |
| <b>XLOC_005651</b> | TNFAIP3      | "tumor necrosis factor, alpha-induced protein 3"                                   | 15.4 | 7.0   | 14.8 | 7.0   | 8.4  | 6.0   |
| <b>XLOC_005746</b> | CITED2       | "Cbpp300-interacting transactivator, with GluAsp-rich carboxy-terminal domain, 2"  | 4.5  | 12.4  | 3.4  | 11.9  | 6.3  | 12.4  |
| <b>XLOC_005756</b> | HDAC2        | histone deacetylase 2                                                              | 68.8 | 52.7  | 81.0 | 60.6  | 93.6 | 64.1  |
| <b>XLOC_005817</b> | SIM1         | single-minded family bHLH transcription factor 1                                   | 4.1  | 1.2   | 6.1  | 1.3   | 3.5  | 0.5   |
| <b>XLOC_005854</b> | GTF3C6       | "general transcription factor IIIC, polypeptide 6, alpha 35kDa"                    | 14.1 | 10.0  | 15.3 | 9.4   | 10.2 | 7.8   |
| <b>XLOC_005867</b> | FOXO3        | forkhead box O3                                                                    | 7.4  | 23.3  | 4.6  | 29.7  | 4.2  | 18.4  |
| <b>XLOC_005870</b> | NR2E1        | "nuclear receptor subfamily 2, group E, member 1"                                  | 52.0 | 51.1  | 71.9 | 43.3  | 83.8 | 50.1  |
| <b>XLOC_005877</b> | PRDM1        | "PR domain containing 1, with ZNF domain"                                          | 1.7  | 1.3   | 0.8  | 0.9   | 0.5  | 0.9   |
| <b>XLOC_005893</b> | POU3F2       | POU class 3 homeobox 2                                                             | 0.6  | 0.0   | 0.3  | 0.2   | 0.2  | 0.3   |

|                    |              |                                                                             |      |      |      |      |      |      |
|--------------------|--------------|-----------------------------------------------------------------------------|------|------|------|------|------|------|
| <b>XLOC_005914</b> | NR3C1        | "nuclear receptor subfamily 3, group C, member 1 (glucocorticoid receptor)" | 9.8  | 22.9 | 9.2  | 25.4 | 12.9 | 24.5 |
| <b>XLOC_005920</b> | AFF4         | "AF4FMR2 family, member 4"                                                  | 5.0  | 8.3  | 3.9  | 9.7  | 5.8  | 9.5  |
| <b>XLOC_005926</b> | IRF1         | interferon regulatory factor 1                                              | 17.0 | 24.8 | 17.7 | 30.4 | 8.9  | 24.7 |
| <b>XLOC_005940</b> | TCF7         | "transcription factor 7 (T-cell specific, HMG-box)"                         | 0.7  | 0.5  | 0.2  | 0.6  | 0.4  | 0.3  |
| <b>XLOC_005955</b> | SMAD5        | SMAD family member 5                                                        | 12.2 | 26.4 | 17.7 | 28.0 | 39.8 | 30.5 |
| <b>XLOC_006013</b> | CNOT8        | "CCR4-NOT transcription complex, subunit 8"                                 | 65.7 | 46.3 | 65.0 | 47.4 | 63.4 | 54.3 |
|                    | PITX1        | paired-like homeodomain 1                                                   |      |      | 0.0  | 0.0  | 0.0  | 0.0  |
| <b>XLOC_006219</b> | PPAP2B       | phosphatidic acid phosphatase type 2B                                       | 6.3  | 14.1 | 2.1  | 18.2 | 3.4  | 14.6 |
| <b>XLOC_006272</b> | DMBX1        | diencephalonmesencephalon homeobox 1                                        | 1.2  | 0.4  | 2.0  | 0.5  | 0.7  | 0.2  |
| <b>XLOC_006279</b> | LOC106032954 | phosphatidylinositol 3-kinase regulatory subunit alpha-like                 | 0.0  | 0.1  | 0.0  | 0.1  |      |      |
| <b>XLOC_006315</b> | NFIA         | nuclear factor IA                                                           | 5.6  | 16.1 | 2.2  | 13.1 | 4.4  | 15.3 |
| <b>XLOC_006333</b> | DMRTB1       | "DMRT-like family B with proline-rich C-terminal, 1"                        | 0.1  | 0.0  | 0.1  | 0.1  | 0.1  | 0.1  |
| <b>XLOC_006466</b> | CEBPG        | "CCAATenhancer binding protein (CEBP), gamma"                               | 40.5 | 36.9 | 50.1 | 35.0 | 69.4 | 42.6 |
| <b>XLOC_006526</b> | SETD6        | SET domain containing 6                                                     | 10.8 | 8.4  | 15.6 | 7.6  | 10.0 | 8.0  |
| <b>XLOC_006547</b> | E2F4         | "E2F transcription factor 4, p107p130-binding"                              | 16.0 | 11.4 | 13.1 | 13.0 | 7.9  | 11.9 |
| <b>XLOC_006593</b> | LOC106033227 | transcription initiation factor TFIID subunit 4-like                        | 3.0  | 2.0  | 1.9  | 2.0  | 1.2  | 1.6  |
| <b>XLOC_006620</b> | MAF          | v-maf avian musculoaponeurotic fibrosarcoma oncogene homolog                | 7.3  | 11.4 | 2.7  | 17.3 | 5.9  | 10.1 |
| <b>XLOC_006659</b> | TFAP4        | transcription factor AP-4 (activating enhancer binding protein 4)           | 8.1  | 9.9  | 9.4  | 9.3  | 8.8  | 13.0 |
| <b>XLOC_006664</b> | CREBBP       | CREB binding protein                                                        | 6.7  | 10.2 | 5.2  | 10.1 | 5.2  | 9.6  |
| <b>XLOC_006745</b> | LOC106033331 | forkhead box protein I1c                                                    | 0.3  | 2.5  | 0.1  | 1.8  | 0.8  | 2.7  |
| <b>XLOC_006791</b> | NLRC3        | "NLR family, CARD domain containing 3"                                      | 0.2  | 0.7  | 0.1  | 0.6  | 0.1  | 0.8  |
| <b>XLOC_006814</b> | GTF3C1       | "general transcription factor IIIC, polypeptide 1, alpha 220kDa"            | 26.4 | 13.2 | 20.5 | 13.3 | 13.4 | 13.2 |
| <b>XLOC_006943</b> | TCF12        | transcription factor 12                                                     | 43.7 | 62.0 | 40.0 | 71.8 | 51.2 | 73.9 |
| <b>XLOC_006970</b> | FOXB1        | forkhead box B1                                                             | 2.4  | 0.3  | 1.2  | 0.3  | 0.3  | 0.2  |
| <b>XLOC_007031</b> | ONECUT1      | one cut homeobox 1                                                          | 0.3  | 0.1  | 0.4  | 0.2  | 0.2  | 0.1  |
| <b>XLOC_007083</b> | RORA         | RAR-related orphan receptor A                                               | 1.8  | 1.7  | 1.8  | 1.7  | 2.7  | 1.6  |

|                    |              |                                                                               |       |       |       |      |       |      |
|--------------------|--------------|-------------------------------------------------------------------------------|-------|-------|-------|------|-------|------|
| <b>XLOC_007204</b> | DBX1         | developing brain homeobox 1                                                   | 0.4   | 0.0   | 0.6   | 0.2  | 0.3   | 0.1  |
| <b>XLOC_007237</b> | PAX6         | paired box 6                                                                  | 0.1   | 0.2   | 0.3   | 0.1  | 0.1   | 0.2  |
| <b>XLOC_007246</b> | WT1          | Wilms tumor 1                                                                 | 536.9 | 102.9 | 171.4 | 98.0 | 135.1 | 89.6 |
| <b>XLOC_007406</b> | BCL10        | B-cell CLLlymphoma 10                                                         | 4.7   | 11.7  | 4.9   | 13.5 | 9.1   | 15.1 |
| <b>XLOC_007458</b> | PGR          | progesterone receptor                                                         | 11.6  | 26.5  | 10.4  | 30.9 | 20.9  | 30.0 |
| <b>XLOC_007538</b> | MED17        | mediator complex subunit 17                                                   | 95.6  | 25.7  | 55.8  | 25.0 | 42.7  | 23.3 |
| <b>XLOC_007571</b> | TAB2         | TGF-beta activated kinase 1MAP3K7 binding protein 2                           | 19.6  | 15.4  | 18.5  | 16.8 | 16.0  | 15.9 |
| <b>XLOC_007582</b> | ESR1         | estrogen receptor 1                                                           | 1.9   | 4.0   | 1.6   | 4.2  | 3.2   | 4.5  |
| <b>XLOC_007731</b> | HDAC3        | histone deacetylase 3                                                         | 39.9  | 38.7  | 45.5  | 36.4 | 28.4  | 38.3 |
| <b>XLOC_007755</b> | FOX11        | forkhead box 11                                                               | 0.2   | 0.1   | 0.2   | 0.2  | 0.1   | 0.2  |
| <b>XLOC_007793</b> | LOC106034406 | uncharacterized LOC106034406                                                  | 0.0   | 2.4   | 0.0   | 2.4  | 0.1   | 2.5  |
| <b>XLOC_007910</b> | GBX2         | gastrulation brain homeobox 2                                                 | 6.3   | 1.6   | 5.9   | 0.7  | 1.7   | 0.5  |
| <b>XLOC_007993</b> | BPTF         | bromodomain PHD finger transcription factor                                   | 11.2  | 7.1   | 9.8   | 7.5  | 9.3   | 6.8  |
| <b>XLOC_008008</b> | TRIM25       | tripartite motif containing 25                                                | 4.4   | 8.5   | 2.9   | 15.8 | 7.3   | 14.7 |
| <b>XLOC_008066</b> | SPHK1        | sphingosine kinase 1                                                          | 12.5  | 16.1  | 6.5   | 13.0 | 3.6   | 16.7 |
| <b>XLOC_008123</b> | ZNF207       | zinc finger protein 207                                                       | 19.0  | 38.6  | 30.6  | 36.8 | 33.1  | 43.3 |
| <b>XLOC_008138</b> | HLF          | hepatic leukemia factor                                                       | 10.7  | 7.3   | 14.8  | 6.0  | 11.8  | 5.2  |
| <b>XLOC_008204</b> | FOXJ1        | forkhead box J1                                                               | 17.6  | 5.9   | 19.7  | 6.1  | 7.2   | 2.6  |
| <b>XLOC_008228</b> | TFAP2A       | transcription factor AP-2 alpha (activating enhancer binding protein 2 alpha) | 2.0   | 0.5   | 1.0   | 0.3  | 0.4   | 0.4  |
| <b>XLOC_008321</b> | TGIF1        | TGFB-induced factor homeobox 1                                                | 5.7   | 11.8  | 5.4   | 11.1 | 6.4   | 8.6  |
| <b>XLOC_008461</b> | TSC22D1      | "TSC22 domain family, member 1"                                               | 9.6   | 8.2   | 10.2  | 7.4  | 7.9   | 6.4  |
| <b>XLOC_008472</b> | ELF1         | E74-like factor 1 (ets domain transcription factor)                           | 20.7  | 18.3  | 11.3  | 21.3 | 18.7  | 21.4 |
| <b>XLOC_008526</b> | GTF2F2       | "general transcription factor IIF, polypeptide 2, 30kDa"                      | 26.3  | 15.3  | 19.2  | 18.5 | 21.8  | 21.6 |
| <b>XLOC_008534</b> | TNFSF11      | "tumor necrosis factor (ligand) superfamily, member 11"                       | 25.4  | 3.3   | 12.1  | 2.3  | 5.5   | 2.2  |
| <b>XLOC_008539</b> | NAA16        | "N(alpha)-acetyltransferase 16, NatA auxiliary subunit"                       | 4.2   | 5.6   | 6.6   | 5.3  | 8.9   | 5.8  |
| <b>XLOC_008604</b> | IRF2         | interferon regulatory factor 2                                                | 9.0   | 14.4  | 7.2   | 15.2 | 8.9   | 14.6 |

|                    |              |                                                                       |       |       |       |       |       |       |
|--------------------|--------------|-----------------------------------------------------------------------|-------|-------|-------|-------|-------|-------|
| <b>XLOC_008698</b> | MTDH         | metadherin                                                            | 40.0  | 45.6  | 34.4  | 51.6  | 42.0  | 57.9  |
| <b>XLOC_008727</b> | ZFPM2        | "zinc finger protein, FOG family member 2"                            | 39.5  | 24.4  | 31.9  | 29.0  | 28.9  | 33.5  |
| <b>XLOC_008765</b> | RNF19A       | "ring finger protein 19A, RBR E3 ubiquitin protein ligase"            | 69.8  | 30.3  | 43.6  | 29.8  | 37.8  | 26.3  |
| <b>XLOC_008780</b> | KLF10        | Kruppel-like factor 10                                                | 31.8  | 15.6  | 18.4  | 20.5  | 9.0   | 14.9  |
| <b>XLOC_008792</b> | ABRA         | actin binding Rho activating protein                                  | 0.0   | 0.1   | 0.0   | 0.1   | 0.1   | 0.0   |
| <b>XLOC_008880</b> | TBX18        | T-box 18                                                              | 0.3   | 0.2   | 0.2   | 0.1   | 0.4   | 0.3   |
| <b>XLOC_008907</b> | BACH2        | "BTB and CNC homology 1, basic leucine zipper transcription factor 2" | 2.0   | 2.1   | 1.2   | 1.9   | 1.7   | 1.6   |
| <b>XLOC_008966</b> | MITF         | microphthalmia-associated transcription factor                        | 9.0   | 5.5   | 5.9   | 6.3   | 3.3   | 5.2   |
| <b>XLOC_009027</b> | FOXP1        | forkhead box P1                                                       | 5.5   | 9.6   | 3.6   | 11.0  | 7.4   | 9.8   |
| <b>XLOC_009265</b> | SHOX         | short stature homeobox                                                | 0.2   | 0.0   | 0.2   | 0.0   | 0.1   | 0.0   |
| <b>XLOC_009396</b> | ISX          | intestine-specific homeobox                                           | 0.0   | 0.0   | 0.0   | 0.1   | 0.0   | 0.2   |
| <b>XLOC_009440</b> | ATF4         | activating transcription factor 4                                     | 144.2 | 317.7 | 159.2 | 335.8 | 152.3 | 354.7 |
| <b>XLOC_009454</b> | EP300        | E1A binding protein p300                                              | 29.6  | 11.5  | 33.2  | 14.6  | 26.5  | 13.9  |
| <b>XLOC_009455</b> | LOC106035824 | histone acetyltransferase p300-like                                   | 148.4 | 15.4  | 205.0 | 43.9  | 185.5 | 46.5  |
| <b>XLOC_009495</b> | RBFOX2       | "RNA binding protein, fox-1 homolog (C. elegans) 2"                   | 10.9  | 30.3  | 5.2   | 35.0  | 7.5   | 31.3  |
| <b>XLOC_009546</b> | IRX1         | iroquois homeobox 1                                                   | 15.3  | 0.5   | 4.0   | 0.1   | 1.5   | 0.2   |
| <b>XLOC_009591</b> | LOC106035954 | iroquois-class homeodomain protein irx-2-like                         | 0.5   | 0.2   | 0.3   | 0.1   | 0.8   | 0.1   |
| <b>XLOC_009627</b> | ZNF236       | zinc finger protein 236                                               | 1.2   | 3.4   | 1.5   | 3.1   | 3.7   | 3.4   |
| <b>XLOC_009631</b> | TSHZ1        | teashirt zinc finger homeobox 1                                       | 3.5   | 5.9   | 4.1   | 6.6   | 4.5   | 4.8   |
| <b>XLOC_009685</b> | LOC106036141 | histone H4 transcription factor-like                                  | 3.0   | 1.2   | 4.1   | 0.7   | 2.5   | 0.4   |
| <b>XLOC_009696</b> | ERG          | v-ets avian erythroblastosis virus E26 oncogene homolog               | 2.1   | 10.0  | 1.0   | 10.9  | 1.8   | 10.7  |
| <b>XLOC_009703</b> | RIPPLY3      | rippy transcriptional repressor 3                                     | 0.0   | 0.1   | 0.1   | 0.4   | 0.2   | 0.2   |
| <b>XLOC_009734</b> | PKNOX1       | PBXknotted 1 homeobox 1                                               | 15.2  | 12.1  | 13.7  | 12.8  | 14.4  | 12.7  |
| <b>XLOC_009771</b> | RIPPLY3      | rippy transcriptional repressor 3                                     | 0.1   | 0.1   | 0.0   | 0.1   | 0.1   | 0.1   |
| <b>XLOC_009772</b> | SIM2         | single-minded family bHLH transcription factor 2                      | 0.6   | 0.2   | 0.5   | 0.0   | 0.4   | 0.1   |
| <b>XLOC_009790</b> | LOC106036243 | phospholipid scramblase 1-like                                        | 28.6  | 26.9  | 28.8  | 28.7  | 28.8  | 27.3  |

|                    |              |                                                                                           |       |       |       |       |       |       |
|--------------------|--------------|-------------------------------------------------------------------------------------------|-------|-------|-------|-------|-------|-------|
| <b>XLOC_009801</b> | TFDP2        | transcription factor Dp-2 (E2F dimerization partner 2)                                    | 12.8  | 12.5  | 13.6  | 14.7  | 17.1  | 17.1  |
| <b>XLOC_009838</b> | PAX3         | paired box 3                                                                              | 1.1   | 0.3   | 1.2   | 0.4   | 0.6   | 0.2   |
| <b>XLOC_009865</b> | ZBTB38       | zinc finger and BTB domain containing 38                                                  | 6.6   | 3.7   | 6.7   | 4.1   | 6.7   | 3.8   |
| <b>XLOC_009957</b> | CREB3        | cAMP responsive element binding protein 3                                                 | 31.2  | 36.0  | 38.0  | 33.0  | 20.7  | 28.2  |
| <b>XLOC_009972</b> | ZNF131       | zinc finger protein 131                                                                   | 12.0  | 5.4   | 13.3  | 7.2   | 17.0  | 6.4   |
| <b>XLOC_010065</b> | NR2F2        | "nuclear receptor subfamily 2, group F, member 2"                                         | 10.6  | 97.9  | 6.7   | 106.6 | 15.9  | 119.6 |
| <b>XLOC_010077</b> | MEF2A        | myocyte enhancer factor 2A                                                                | 28.1  | 15.3  | 11.6  | 19.1  | 11.6  | 18.5  |
| <b>XLOC_010234</b> | DAP          | death-associated protein                                                                  | 96.9  | 153.0 | 144.3 | 168.6 | 407.5 | 195.6 |
| <b>XLOC_010337</b> | REL          | v-rel avian reticuloendotheliosis viral oncogene homolog                                  | 6.1   | 7.5   | 5.6   | 9.0   | 6.1   | 7.9   |
| <b>XLOC_010353</b> | NR2C2        | "nuclear receptor subfamily 2, group C, member 2"                                         | 5.4   | 9.4   | 7.4   | 9.7   | 13.4  | 10.9  |
| <b>XLOC_010427</b> | IRAK2        | interleukin-1 receptor-associated kinase 2                                                | 19.9  | 15.9  | 17.9  | 18.5  | 21.7  | 17.5  |
| <b>XLOC_010526</b> | LOC106036866 | zinc finger protein 260-like                                                              | 0.2   | 1.0   | 0.1   | 1.2   | 0.1   | 1.1   |
| <b>XLOC_010541</b> | CSRNP1       | cysteine-serine-rich nuclear protein 1                                                    | 10.4  | 17.6  | 7.4   | 21.6  | 7.9   | 18.2  |
| <b>XLOC_010640</b> | ELK3         | "ELK3, ETS-domain protein (SRF accessory protein 2)"                                      | 7.8   | 32.9  | 3.5   | 42.5  | 10.0  | 33.9  |
| <b>XLOC_010664</b> | NR1H4        | "nuclear receptor subfamily 1, group H, member 4"                                         | 0.2   | 0.0   | 0.5   | 0.1   | 0.5   | 0.1   |
| <b>XLOC_010702</b> | NR2C1        | "nuclear receptor subfamily 2, group C, member 1"                                         | 16.8  | 23.3  | 20.4  | 19.3  | 31.1  | 20.7  |
| <b>XLOC_010761</b> | GABPA        | "GA binding protein transcription factor, alpha subunit 60kDa"                            | 36.7  | 23.7  | 20.6  | 24.6  | 23.4  | 28.7  |
| <b>XLOC_010860</b> | TRAF2        | TNF receptor-associated factor 2                                                          | 8.8   | 13.2  | 11.7  | 14.7  | 7.5   | 13.2  |
| <b>XLOC_010897</b> | TRIM32       | tripartite motif containing 32                                                            | 1.7   | 3.3   | 2.7   | 3.0   | 2.9   | 3.1   |
| <b>XLOC_010956</b> | ARID4A       | AT rich interactive domain 4A (RBP1-like)                                                 | 11.8  | 8.1   | 4.4   | 9.3   | 5.3   | 9.0   |
| <b>XLOC_010972</b> | SIX6         | SIX homeobox 6                                                                            | 0.0   | 0.0   | 0.0   | 0.0   |       |       |
| <b>XLOC_010981</b> | HIF1A        | "hypoxia inducible factor 1, alpha subunit (basic helix-loop-helix transcription factor)" | 13.6  | 29.4  | 14.2  | 33.0  | 23.4  | 29.7  |
| <b>XLOC_011020</b> | AKT1         | v-akt murine thymoma viral oncogene homolog 1                                             | 21.5  | 32.7  | 20.1  | 43.0  | 16.7  | 36.6  |
| <b>XLOC_011046</b> | LOC106037285 | "chromosome unknown open reading frame, human C14orf39"                                   | 0.1   | 0.0   | 0.2   | 0.0   | 0.1   | 0.0   |
| <b>XLOC_011062</b> | ESR2         | estrogen receptor 2 (ER beta)                                                             | 1.3   | 1.8   | 1.4   | 1.0   | 1.0   | 1.6   |
| <b>XLOC_011167</b> | SMAD2        | SMAD family member 2                                                                      | 110.3 | 127.1 | 122.1 | 247.3 | 576.4 | 264.1 |



|                    |              |                                                                                        |       |      |       |      |      |      |
|--------------------|--------------|----------------------------------------------------------------------------------------|-------|------|-------|------|------|------|
| <b>XLOC_011174</b> | SMAD7        | SMAD family member 7                                                                   | 3.9   | 11.0 | 3.4   | 9.1  | 12.3 | 11.9 |
| <b>XLOC_011254</b> | FOXO4        | forkhead box O4                                                                        | 10.9  | 22.6 | 19.1  | 21.4 | 16.4 | 18.9 |
| <b>XLOC_011279</b> | ZIC3         | Zic family member 3                                                                    | 0.3   | 0.0  | 0.1   | 0.0  | 0.0  | 0.2  |
| <b>XLOC_011331</b> | MEOX2        | mesenchyme homeobox 2                                                                  | 0.5   | 2.3  | 0.2   | 2.0  | 0.5  | 2.4  |
| <b>XLOC_011335</b> | ETV1         | ets variant 1                                                                          | 11.8  | 11.2 | 12.9  | 9.4  | 14.2 | 10.4 |
| <b>XLOC_011347</b> | DLX5         | distal-less homeobox 5                                                                 | 0.1   | 0.3  | 0.0   | 0.1  | 0.2  | 0.2  |
| <b>XLOC_011388</b> | DLX6         | distal-less homeobox 6                                                                 | 0.6   | 0.2  | 0.6   | 0.2  | 0.1  | 0.1  |
| <b>XLOC_011422</b> | TAF4B        | "TAF4b RNA polymerase II, TATA box binding protein (TBP)-associated factor, 105kDa"    | 163.8 | 14.3 | 58.1  | 8.5  | 34.7 | 8.9  |
| <b>XLOC_011560</b> | TAF7L        | "TAF7-like RNA polymerase II, TATA box binding protein (TBP)-associated factor, 50kDa" | 200.9 | 76.0 | 188.4 | 68.2 | 85.0 | 61.6 |
| <b>XLOC_011597</b> | PASD1        | PAS domain containing 1                                                                | 1.2   | 0.8  | 1.2   | 1.0  | 0.8  | 0.9  |
| <b>XLOC_011653</b> | TAF1         | "TAF1 RNA polymerase II, TATA box binding protein (TBP)-associated factor, 250kDa"     | 27.4  | 25.1 | 30.2  | 26.6 | 28.5 | 25.4 |
| <b>XLOC_011724</b> | SCML2        | sex comb on midleg-like 2 (Drosophila)                                                 | 1.5   | 3.2  | 2.3   | 2.8  | 3.6  | 3.3  |
| <b>XLOC_011761</b> | RUNX3        | runt-related transcription factor 3                                                    | 18.1  | 3.1  | 10.5  | 2.7  | 2.0  | 3.1  |
| <b>XLOC_011774</b> | MYCL         | v-myc avian myelocytomatosis viral oncogene lung carcinoma derived homolog             | 27.1  | 14.1 | 23.9  | 11.2 | 19.5 | 11.9 |
| <b>XLOC_011800</b> | HDAC1        | histone deacetylase 1                                                                  | 17.1  | 18.2 | 17.2  | 18.5 | 17.3 | 19.5 |
|                    | LOC106038051 | transcription factor AP-2-epsilon-like                                                 |       |      | 0.0   | 0.1  |      |      |
| <b>XLOC_011827</b> | LOC106038050 | transcription factor AP-2-epsilon-like                                                 | 0.0   | 0.1  | 0.0   | 0.1  | 0.0  | 0.0  |
| <b>XLOC_011847</b> | MTF1         | metal-regulatory transcription factor 1                                                | 5.7   | 4.0  | 7.5   | 4.5  | 3.9  | 2.8  |
| <b>XLOC_011902</b> | GRHL3        | grainyhead-like 3 (Drosophila)                                                         | 3.3   | 0.1  | 3.2   | 0.1  | 2.0  | 0.2  |
| <b>XLOC_011969</b> | MTF1         | metal-regulatory transcription factor 1                                                | 28.5  | 7.1  | 17.9  | 7.4  | 11.6 | 7.2  |
| <b>XLOC_012036</b> | HMBOX1       | homeobox containing 1                                                                  | 5.6   | 4.5  | 3.6   | 4.2  | 4.4  | 4.4  |
| <b>XLOC_012045</b> | GATA4        | GATA binding protein 4                                                                 | 33.1  | 74.6 | 48.9  | 66.0 | 81.8 | 76.1 |
| <b>XLOC_012070</b> | RUNX2        | runt-related transcription factor 2                                                    | 0.3   | 3.4  | 0.1   | 4.2  | 2.7  | 2.0  |
| <b>XLOC_012098</b> | SOX7         | SRY (sex determining region Y)-box 7                                                   | 1.3   | 6.9  | 0.5   | 5.4  | 0.7  | 5.9  |
| <b>XLOC_012124</b> | TFAP2B       | transcription factor AP-2 beta (activating enhancer binding protein 2 beta)            | 8.2   | 1.4  | 7.6   | 1.7  | 3.8  | 0.9  |
| <b>XLOC_012125</b> | TFAP2D       | transcription factor AP-2 delta (activating enhancer binding protein 2 delta)          | 0.0   | 0.0  | 0.0   | 0.0  | 0.0  | 0.0  |

|                    |              |                                                                                    |       |       |       |       |       |       |
|--------------------|--------------|------------------------------------------------------------------------------------|-------|-------|-------|-------|-------|-------|
| <b>XLOC_012135</b> | SUPT3H       | suppressor of Ty 3 homolog ( <i>S. cerevisiae</i> )                                | 8.7   | 13.6  | 8.7   | 16.0  | 14.9  | 14.5  |
| <b>XLOC_012169</b> | ARNTL2       | aryl hydrocarbon receptor nuclear translocator-like 2                              | 7.6   | 8.9   | 7.2   | 9.9   | 12.7  | 9.3   |
| <b>XLOC_012218</b> | PPARA        | peroxisome proliferator-activated receptor alpha                                   | 4.8   | 3.0   | 5.3   | 3.1   | 7.5   | 3.2   |
| <b>XLOC_012228</b> | BHLHE41      | "basic helix-loop-helix family, member e41"                                        | 31.6  | 17.8  | 11.4  | 24.2  | 11.6  | 27.5  |
| <b>XLOC_012276</b> | SOX4         | SRY (sex determining region Y)-box 4                                               | 4.2   | 25.0  | 3.5   | 29.1  | 13.2  | 21.5  |
| <b>XLOC_012289</b> | NFATC1       | "nuclear factor of activated T-cells, cytoplasmic, calcineurin-dependent 1"        | 2.6   | 5.3   | 2.0   | 7.9   | 3.0   | 7.3   |
| <b>XLOC_012294</b> | ADNP2        | ADNP homeobox 2                                                                    | 17.4  | 11.6  | 13.7  | 11.8  | 15.1  | 11.2  |
| <b>XLOC_012336</b> | CTNNB1       | "catenin (cadherin-associated protein), beta 1, 88kDa"                             | 126.9 | 225.0 | 122.1 | 258.4 | 160.2 | 325.3 |
| <b>XLOC_012408</b> | ST18         | "suppression of tumorigenicity 18, zinc finger"                                    | 3.2   | 1.0   | 3.2   | 0.3   | 1.8   | 0.3   |
| <b>XLOC_012432</b> | SNAI2        | snail family zinc finger 2                                                         | 9.9   | 152.2 | 5.5   | 203.6 | 19.9  | 125.2 |
| <b>XLOC_012437</b> | ST18         | "suppression of tumorigenicity 18, zinc finger"                                    | 0.1   | 0.1   | 0.1   | 0.1   | 0.1   | 0.0   |
| <b>XLOC_012473</b> | ZHX1         | zinc fingers and homeoboxes 1                                                      | 7.6   | 12.1  | 6.1   | 13.1  | 6.1   | 13.8  |
| <b>XLOC_012484</b> | TAF2         | "TAF2 RNA polymerase II, TATA box binding protein (TBP)-associated factor, 150kDa" | 48.4  | 36.0  | 41.4  | 40.4  | 32.2  | 41.5  |
| <b>XLOC_012496</b> | MYC          | v-myc avian myelocytomatosis viral oncogene homolog                                | 7.8   | 25.0  | 5.7   | 24.4  | 10.9  | 27.1  |
| <b>XLOC_012517</b> | ZHX2         | zinc fingers and homeoboxes 2                                                      | 3.5   | 9.1   | 3.8   | 9.6   | 4.3   | 8.7   |
|                    | LOC106038555 | homeobox protein CDX-1-like                                                        |       |       | 0.1   | 0.0   |       |       |
| <b>XLOC_012537</b> | LOC106038556 | homeobox protein CDX-4-like                                                        | 0.0   | 0.0   | 0.0   | 0.0   |       |       |
| <b>XLOC_012564</b> | PSMD10       | "proteasome (prosome, macropain) 26S subunit, non-ATPase, 10"                      | 47.6  | 35.1  | 53.7  | 38.3  | 46.5  | 36.5  |
| <b>XLOC_012588</b> | RLIM         | "ring finger protein, LIM domain interacting"                                      | 18.4  | 12.8  | 20.3  | 12.9  | 18.2  | 11.8  |
| <b>XLOC_012624</b> | LOC106038686 | PR domain zinc finger protein 5-like                                               | 0.6   | 3.9   | 1.0   | 4.0   | 2.0   | 4.3   |
| <b>XLOC_012650</b> | PITX2        | paired-like homeodomain 2                                                          | 2.7   | 0.4   | 2.5   | 0.3   | 0.2   | 0.0   |
| <b>XLOC_012661</b> | LEF1         | lymphoid enhancer-binding factor 1                                                 | 10.6  | 10.8  | 4.3   | 10.9  | 2.9   | 13.5  |
| <b>XLOC_012755</b> | GATA3        | GATA binding protein 3                                                             | 4.4   | 3.4   | 3.7   | 4.1   | 1.0   | 4.0   |
| <b>XLOC_012835</b> | VSX2         | visual system homeobox 2                                                           | 0.8   | 0.1   | 0.3   | 0.1   | 0.3   | 0.1   |
| <b>XLOC_012849</b> | FOS          | FBJ murine osteosarcoma viral oncogene homolog                                     | 41.7  | 20.9  | 47.6  | 22.5  | 22.6  | 15.0  |
| <b>XLOC_012859</b> | ESRRB        | estrogen-related receptor beta                                                     | 1.5   | 1.2   | 2.0   | 1.9   | 3.4   | 1.5   |

|                    |              |                                                                   |       |       |       |       |       |       |
|--------------------|--------------|-------------------------------------------------------------------|-------|-------|-------|-------|-------|-------|
| <b>XLOC_012898</b> | FOXA1        | forkhead box A1                                                   | 0.1   | 0.0   | 0.1   | 0.0   | 0.0   | 0.0   |
| <b>XLOC_012988</b> | DIP2C        | disco-interacting protein 2 homolog C                             | 7.5   | 8.1   | 6.6   | 8.8   | 8.9   | 9.0   |
|                    | LOC106038953 | homeobox protein HMX3-like                                        |       |       | 0.1   | 0.0   |       |       |
| <b>XLOC_013208</b> | KLF3         | Kruppel-like factor 3 (basic)                                     | 11.4  | 6.5   | 5.2   | 6.2   | 5.9   | 6.2   |
| <b>XLOC_013264</b> | APBB2        | "amyloid beta (A4) precursor protein-binding, family B, member 2" | 17.7  | 18.4  | 11.9  | 18.8  | 13.0  | 19.0  |
| <b>XLOC_013272</b> | MAP3K13      | mitogen-activated protein kinase kinase kinase 13                 | 13.2  | 6.8   | 15.7  | 6.8   | 9.6   | 5.2   |
| <b>XLOC_013297</b> | UBXN7        | UBX domain protein 7                                              | 14.3  | 8.0   | 11.6  | 10.3  | 9.4   | 10.3  |
| <b>XLOC_013314</b> | LOC106039179 | extensin-like                                                     | 9.4   | 4.1   | 4.4   | 3.4   | 1.8   | 2.8   |
| <b>XLOC_013383</b> | ETV5         | ets variant 5                                                     | 12.6  | 20.7  | 15.6  | 19.5  | 7.9   | 18.7  |
| <b>XLOC_013453</b> | FEV          | FEV (ETS oncogene family)                                         | 10.6  | 6.1   | 6.5   | 2.2   | 6.0   | 2.3   |
| <b>XLOC_013455</b> | RNF25        | ring finger protein 25                                            | 11.9  | 8.7   | 13.9  | 9.2   | 7.5   | 8.8   |
|                    | EN1          | engrailed homeobox 1                                              |       |       | 0.2   | 0.0   | 0.0   | 0.2   |
| <b>XLOC_013505</b> | STK36        | serinethreonine kinase 36                                         | 2.3   | 4.0   | 1.9   | 4.8   | 2.4   | 4.5   |
| <b>XLOC_013626</b> | T            | T brachyury transcription factor                                  | 5.1   | 1.3   | 4.4   | 1.6   | 1.7   | 0.9   |
| <b>XLOC_013744</b> | CYLD         | cylindromatosis (turban tumor syndrome)                           | 5.5   | 5.8   | 5.1   | 5.9   | 11.5  | 6.1   |
| <b>XLOC_013780</b> | TSHZ3        | teashirt zinc finger homeobox 3                                   | 6.3   | 12.0  | 6.0   | 13.4  | 19.3  | 14.8  |
| <b>XLOC_013833</b> | GATAD1       | GATA zinc finger domain containing 1                              | 17.9  | 18.8  | 29.5  | 19.6  | 30.6  | 23.3  |
| <b>XLOC_013905</b> | TRIM29       | tripartite motif containing 29                                    | 2.4   | 0.3   | 0.6   | 0.2   | 0.2   | 0.3   |
| <b>XLOC_014016</b> | POU2F3       | POU class 2 homeobox 3                                            | 1.8   | 0.7   | 3.4   | 0.6   | 1.8   | 0.5   |
| <b>XLOC_014029</b> | HINFP        | histone H4 transcription factor                                   | 24.6  | 18.8  | 36.9  | 17.8  | 19.9  | 17.0  |
| <b>XLOC_014066</b> | FOXR1        | forkhead box R1                                                   | 0.1   | 0.3   | 0.4   | 0.3   | 0.8   | 0.3   |
| <b>XLOC_014228</b> | STAT1        | "signal transducer and activator of transcription 1, 91kDa"       | 109.9 | 146.2 | 115.7 | 162.1 | 142.1 | 200.1 |
| <b>XLOC_014229</b> | STAT4        | signal transducer and activator of transcription 4                | 0.6   | 1.2   | 0.4   | 1.4   | 0.8   | 1.4   |
| <b>XLOC_014255</b> | SATB2        | SATB homeobox 2                                                   | 0.7   | 0.6   | 0.6   | 0.9   | 0.4   | 0.9   |
| <b>XLOC_014288</b> | HDAC11       | histone deacetylase 11                                            | 3.9   | 6.2   | 4.7   | 6.4   | 9.4   | 6.7   |
| <b>XLOC_014356</b> | PAX7         | paired box 7                                                      | 0.1   | 0.0   | 0.0   | 0.0   | 0.0   | 0.0   |

|                    |              |                                                                                    |       |       |       |       |       |       |
|--------------------|--------------|------------------------------------------------------------------------------------|-------|-------|-------|-------|-------|-------|
| <b>XLOC_014403</b> | DDX58        | DEAD (Asp-Glu-Ala-Asp) box polypeptide 58                                          | 5.5   | 5.1   | 4.1   | 7.1   | 4.3   | 6.5   |
| <b>XLOC_014460</b> | PRDM2        | "PR domain containing 2, with ZNF domain"                                          | 19.7  | 11.3  | 23.3  | 10.3  | 30.9  | 10.7  |
| <b>XLOC_014461</b> | LOC106040219 | PR domain zinc finger protein 2-like                                               | 9.8   | 9.3   | 18.6  | 11.6  | 11.8  | 9.7   |
| <b>XLOC_014471</b> | TNFRSF8      | "tumor necrosis factor receptor superfamily, member 8"                             | 0.6   | 0.8   | 0.6   | 0.8   | 1.5   | 0.8   |
| <b>XLOC_014513</b> | FOXL2        | forkhead box L2                                                                    | 439.3 | 342.7 | 489.9 | 372.4 | 336.8 | 369.7 |
| <b>XLOC_014567</b> | LOC106040339 | transcription cofactor HES-6-like                                                  | 1.1   | 0.3   | 0.7   | 0.2   | 0.6   | 0.1   |
| <b>XLOC_014681</b> | KLF4         | Kruppel-like factor 4 (gut)                                                        | 4.0   | 4.7   | 5.7   | 3.9   | 9.7   | 4.5   |
| <b>XLOC_014741</b> | LOC106040490 | mitogen-activated protein kinase 11-like                                           | 90.8  | 41.1  | 97.3  | 30.4  | 67.8  | 25.7  |
| <b>XLOC_014834</b> | WNT5A        | "wingless-type MMTV integration site family, member 5A"                            | 5.0   | 11.0  | 2.5   | 9.9   | 2.8   | 9.7   |
| <b>XLOC_014839</b> | HESX1        | HESX homeobox 1                                                                    | 4.3   | 0.4   | 2.2   | 0.4   | 2.2   | 0.6   |
| <b>XLOC_014849</b> | PKNOX2       | PBXknotted 1 homeobox 2                                                            | 32.9  | 18.4  | 15.0  | 22.2  | 7.4   | 24.3  |
| <b>XLOC_014859</b> | FLI1         | "Fli-1 proto-oncogene, ETS transcription factor"                                   | 5.1   | 17.9  | 2.0   | 19.2  | 4.3   | 18.5  |
| <b>XLOC_014992</b> | LHX2         | LIM homeobox 2                                                                     | 9.6   | 3.2   | 8.1   | 3.2   | 5.4   | 2.3   |
| <b>XLOC_015009</b> | PBX3         | pre-B-cell leukemia homeobox 3                                                     | 7.9   | 10.2  | 7.4   | 11.5  | 9.7   | 11.9  |
| <b>XLOC_015040</b> | TRAF1        | TNF receptor-associated factor 1                                                   | 22.4  | 9.6   | 22.2  | 8.8   | 15.2  | 6.9   |
| <b>XLOC_015048</b> | LHX6         | LIM homeobox 6                                                                     | 2.5   | 8.0   | 2.5   | 8.0   | 1.8   | 8.7   |
| <b>XLOC_015066</b> | NR5A1        | "nuclear receptor subfamily 5, group A, member 1"                                  | 84.7  | 57.2  | 59.5  | 65.4  | 41.4  | 64.7  |
| <b>XLOC_015071</b> | NR6A1        | "nuclear receptor subfamily 6, group A, member 1"                                  | 4.0   | 2.9   | 3.3   | 2.8   | 1.4   | 1.7   |
| <b>XLOC_015093</b> | ZGPAT        | "zinc finger, CCCH-type with G patch domain"                                       | 14.0  | 10.0  | 14.0  | 10.6  | 7.8   | 9.7   |
| <b>XLOC_015109</b> | MYT1         | myelin transcription factor 1                                                      | 0.8   | 0.1   | 0.5   | 0.1   | 0.1   | 0.1   |
| <b>XLOC_015124</b> | TCFL5        | transcription factor-like 5 (basic helix-loop-helix)                               | 1.9   | 0.7   | 2.4   | 0.9   | 1.0   | 0.5   |
| <b>XLOC_015137</b> | TAF4         | "TAF4 RNA polymerase II, TATA box binding protein (TBP)-associated factor, 135kDa" | 2.7   | 3.5   | 1.8   | 3.8   | 2.8   | 3.8   |
| <b>XLOC_015247</b> | TEAD1        | TEA domain family member 1 (SV40 transcriptional enhancer factor)                  | 6.2   | 12.5  | 5.6   | 12.8  | 15.3  | 14.8  |
| <b>XLOC_015293</b> | ELF2         | E74-like factor 2 (ets domain transcription factor)                                | 21.7  | 19.6  | 17.2  | 18.6  | 19.0  | 20.8  |
| <b>XLOC_015329</b> | NAA15        | "N(alpha)-acetyltransferase 15, NatA auxiliary subunit"                            | 62.4  | 17.3  | 35.3  | 18.8  | 28.1  | 19.9  |
| <b>XLOC_015331</b> | NOCT         | nocturnin                                                                          | 18.8  | 12.4  | 24.2  | 13.4  | 17.4  | 12.0  |

|                    |              |                                                              |      |      |      |      |      |      |
|--------------------|--------------|--------------------------------------------------------------|------|------|------|------|------|------|
| <b>XLOC_015377</b> | ZEB2         | zinc finger E-box binding homeobox 2                         | 15.1 | 35.4 | 9.3  | 40.6 | 12.2 | 36.2 |
| <b>XLOC_015388</b> | MLXIPL       | MLX interacting protein-like                                 | 0.8  | 0.4  | 0.8  | 0.4  | 0.8  | 0.3  |
| <b>XLOC_015426</b> | MLXIPL       | MLX interacting protein-like                                 | 1.7  | 0.4  | 0.9  | 0.3  | 0.3  | 0.2  |
| <b>XLOC_015441</b> | HSF5         | heat shock transcription factor family member 5              | 0.5  | 0.1  | 0.5  | 0.1  | 0.3  | 0.1  |
| <b>XLOC_015470</b> | GTF2IRD1     | GTF2I repeat domain containing 1                             | 1.6  | 3.8  | 1.5  | 3.6  | 1.6  | 3.6  |
| <b>XLOC_015480</b> | LOC106041112 | GS homeobox 1-like                                           | 0.1  | 0.0  |      |      | 0.1  | 0.0  |
| <b>XLOC_015560</b> | CIITA        | "class II, major histocompatibility complex, transactivator" | 4.9  | 2.6  | 9.7  | 1.5  | 6.3  | 1.6  |
| <b>XLOC_015588</b> | USP7         | ubiquitin specific peptidase 7 (herpes virus-associated)     | 64.1 | 27.5 | 41.1 | 30.5 | 36.0 | 30.1 |
| <b>XLOC_015662</b> | PHTF1        | putative homeodomain transcription factor 1                  | 6.5  | 7.4  | 5.4  | 7.6  | 7.5  | 7.7  |
| <b>XLOC_015710</b> | ELK4         | "ELK4, ETS-domain protein (SRF accessory protein 1)"         | 2.1  | 7.7  | 1.3  | 8.1  | 4.0  | 7.6  |
| <b>XLOC_015732</b> | LOC106041382 | bile acid receptor-like                                      | 1.2  | 0.5  | 1.0  | 0.9  | 0.6  | 0.4  |
| <b>XLOC_015804</b> | SOX13        | SRY (sex determining region Y)-box 13                        | 0.1  | 0.8  | 0.0  | 0.9  | 0.1  | 1.0  |
| <b>XLOC_015913</b> | CUX1         | cut-like homeobox 1                                          | 19.7 | 19.8 | 12.0 | 37.4 | 12.7 | 26.8 |
| <b>XLOC_015929</b> | MYBBP1A      | MYB binding protein (P160) 1a                                | 22.0 | 17.1 | 23.2 | 19.8 | 20.7 | 22.2 |
| <b>XLOC_015941</b> | ALX1         | ALX homeobox 1                                               | 0.1  | 2.9  | 0.1  | 5.7  | 0.3  | 4.0  |
| <b>XLOC_015974</b> | ATF6         | activating transcription factor 6                            | 28.0 | 24.7 | 25.6 | 25.3 | 19.7 | 24.5 |
| <b>XLOC_015978</b> | NOTCH2       | notch 2                                                      | 41.3 | 40.4 | 42.5 | 36.5 | 18.1 | 30.9 |
| <b>XLOC_016018</b> | DDR2         | discoidin domain receptor tyrosine kinase 2                  | 1.5  | 7.3  | 1.6  | 7.4  | 1.3  | 8.7  |
| <b>XLOC_016026</b> | MTA1         | metastasis associated 1                                      | 33.0 | 35.3 | 28.3 | 31.8 | 20.6 | 30.8 |
| <b>XLOC_016047</b> | PRRX1        | paired related homeobox 1                                    | 7.6  | 4.1  | 4.1  | 5.5  | 1.7  | 4.5  |
| <b>XLOC_016054</b> | LOC106041605 | pre-B-cell leukemia transcription factor 1                   | 7.8  | 23.7 | 8.1  | 30.1 | 9.7  | 27.0 |
| <b>XLOC_016144</b> | E2F3         | E2F transcription factor 3                                   | 1.5  | 2.1  | 1.8  | 2.5  | 2.8  | 3.1  |
| <b>XLOC_016322</b> | UBP1         | upstream binding protein 1 (LBP-1a)                          | 10.8 | 33.2 | 17.3 | 40.7 | 34.9 | 40.4 |
| <b>XLOC_016355</b> | MAPK10       | mitogen-activated protein kinase 10                          | 0.1  | 0.2  | 0.4  | 0.7  | 0.2  | 0.3  |
| <b>XLOC_016433</b> | ZNF281       | zinc finger protein 281                                      | 19.9 | 8.6  | 10.3 | 9.2  | 8.7  | 8.6  |
| <b>XLOC_016472</b> | LHX9         | LIM homeobox 9                                               | 19.0 | 11.6 | 13.5 | 20.2 | 11.5 | 13.6 |

|                    |              |                                                           |       |       |       |       |       |       |
|--------------------|--------------|-----------------------------------------------------------|-------|-------|-------|-------|-------|-------|
| <b>XLOC_016525</b> | ZNF277       | zinc finger protein 277                                   | 53.3  | 17.5  | 27.0  | 17.4  | 36.7  | 19.0  |
| <b>XLOC_016533</b> | FOXP2        | forkhead box P2                                           | 2.5   | 5.2   | 3.4   | 4.5   | 3.6   | 5.3   |
| <b>XLOC_016559</b> | FOXP2        | forkhead box P2                                           | 2.8   | 0.1   | 0.9   | 0.2   | 0.2   | 0.1   |
| <b>XLOC_016606</b> | JMY          | "junction mediating and regulatory protein, p53 cofactor" | 6.0   | 6.2   | 5.6   | 5.7   | 9.0   | 5.5   |
| <b>XLOC_016708</b> | LOC106042201 | ubiquitin carboxyl-terminal hydrolase CYLD-like           | 3.4   | 6.4   | 4.9   | 5.6   | 4.0   | 5.3   |
|                    | FOXA2        | forkhead box A2                                           |       |       | 0.1   | 0.0   | 0.0   | 0.0   |
| <b>XLOC_016854</b> | KLF12        | Kruppel-like factor 12                                    | 4.7   | 3.9   | 5.8   | 2.9   | 8.6   | 3.8   |
| <b>XLOC_016919</b> | ARRB1        | "arrestin, beta 1"                                        | 16.8  | 46.7  | 16.9  | 54.4  | 11.6  | 47.9  |
| <b>XLOC_017098</b> | LHX4         | LIM homeobox 4                                            | 0.3   | 0.4   | 0.5   | 0.1   | 0.1   | 0.1   |
| <b>XLOC_017164</b> | MSL3         | male-specific lethal 3 homolog (Drosophila)               | 125.5 | 105.2 | 96.1  | 113.3 | 110.2 | 117.2 |
| <b>XLOC_017174</b> | TBL1X        | transducin (beta)-like 1X-linked                          | 25.8  | 24.6  | 25.7  | 25.5  | 23.1  | 28.7  |
| <b>XLOC_017261</b> | ZNF438       | zinc finger protein 438                                   | 1.7   | 3.8   | 2.1   | 3.8   | 4.0   | 4.3   |
| <b>XLOC_017273</b> | MKX          | mohawk homeobox                                           | 2.2   | 21.0  | 2.6   | 29.5  | 1.9   | 40.5  |
| <b>XLOC_017284</b> | ZEB1         | zinc finger E-box binding homeobox 1                      | 2.4   | 9.0   | 1.9   | 8.7   | 3.8   | 9.5   |
| <b>XLOC_017303</b> | RAB18        | "RAB18, member RAS oncogene family"                       | 142.8 | 91.2  | 111.7 | 92.5  | 143.9 | 101.6 |
| <b>XLOC_017314</b> | TRPS1        | trichorhinophalangeal syndrome I                          | 0.8   | 2.4   | 1.1   | 2.6   | 2.6   | 2.3   |
| <b>XLOC_017384</b> | CREBRF       | CREB3 regulatory factor                                   | 4.2   | 6.1   | 4.0   | 5.3   | 5.8   | 4.7   |
| <b>XLOC_017391</b> | MSX2         | msh homeobox 2                                            | 19.6  | 2.0   | 21.0  | 1.2   | 8.4   | 1.9   |
| <b>XLOC_017393</b> | BRD8         | bromodomain containing 8                                  | 27.6  | 16.1  | 24.5  | 15.8  | 16.3  | 15.4  |
| <b>XLOC_017504</b> | POU6F2       | POU class 6 homeobox 2                                    | 24.3  | 6.2   | 16.4  | 4.4   | 17.4  | 7.2   |
| <b>XLOC_017566</b> | DMRT3        | doublesex and mab-3 related transcription factor 3        | 0.0   | 0.0   | 0.0   | 0.1   | 0.1   | 0.0   |
| <b>XLOC_017568</b> | DMRT2        | doublesex and mab-3 related transcription factor 2        | 4.3   | 1.0   | 4.0   | 0.5   | 3.0   | 0.6   |
| <b>XLOC_017615</b> | TBX22        | T-box 22                                                  | 1.1   | 0.9   | 1.1   | 0.3   | 0.4   | 0.3   |
| <b>XLOC_017667</b> | HDX          | highly divergent homeobox                                 | 7.5   | 5.7   | 9.0   | 5.7   | 9.1   | 5.3   |
| <b>XLOC_017760</b> | LOC106043073 | iroquois-class homeodomain protein irx-3-like             | 34.3  | 5.7   | 9.2   | 11.9  | 2.1   | 9.9   |
| <b>XLOC_017801</b> | FOXN2        | forkhead box N2                                           | 9.6   | 8.4   | 5.1   | 9.4   | 6.7   | 9.8   |

|                    |              |                                                                       |       |       |       |       |       |       |
|--------------------|--------------|-----------------------------------------------------------------------|-------|-------|-------|-------|-------|-------|
| <b>XLOC_017804</b> | GTF2A1L      | "general transcription factor IIA, 1-like"                            | 10.8  | 1.4   | 3.7   | 1.6   | 1.8   | 0.9   |
| <b>XLOC_017818</b> | GTF2A1L      | "general transcription factor IIA, 1-like"                            | 0.1   | 0.2   | 0.0   | 0.1   | 0.1   | 0.2   |
| <b>XLOC_017862</b> | LOC106043168 | homeobox protein not2-like                                            | 3.9   | 0.1   | 1.7   | 0.2   | 0.8   | 0.2   |
| <b>XLOC_017874</b> | VAX2         | ventral anterior homeobox 2                                           | 0.2   | 0.7   | 0.2   | 0.8   | 0.2   | 0.9   |
| <b>XLOC_017907</b> | SMAD9        | SMAD family member 9                                                  | 29.9  | 27.6  | 24.9  | 33.6  | 25.4  | 38.4  |
| <b>XLOC_017928</b> | SMAD9        | SMAD family member 9                                                  | 1.4   | 4.7   | 2.2   | 4.0   | 4.7   | 4.5   |
| <b>XLOC_017990</b> | NR0B1        | "nuclear receptor subfamily 0, group B, member 1"                     | 59.2  | 142.2 | 49.3  | 139.9 | 71.1  | 125.1 |
| <b>XLOC_017992</b> | TAB3         | TGF-beta activated kinase 1MAP3K7 binding protein 3                   | 13.0  | 11.1  | 10.4  | 13.0  | 12.9  | 13.3  |
| <b>XLOC_018048</b> | ARNT2        | aryl-hydrocarbon receptor nuclear translocator 2                      | 14.9  | 11.0  | 8.0   | 10.9  | 6.7   | 10.3  |
| <b>XLOC_018058</b> | BNC1         | basonuclin 1                                                          | 4.8   | 1.7   | 4.5   | 2.5   | 5.8   | 1.7   |
| <b>XLOC_018101</b> | RUNX1        | runt-related transcription factor 1                                   | 1.8   | 7.3   | 1.6   | 8.2   | 4.8   | 7.1   |
| <b>XLOC_018119</b> | PAXBP1       | PAX3 and PAX7 binding protein 1                                       | 25.9  | 24.1  | 20.8  | 24.7  | 29.8  | 24.4  |
| <b>XLOC_018160</b> | BACH1        | "BTB and CNC homology 1, basic leucine zipper transcription factor 1" | 14.1  | 14.8  | 13.4  | 15.3  | 10.8  | 13.2  |
| <b>XLOC_018202</b> | MAFB         | v-maf avian musculoaponeurotic fibrosarcoma oncogene homolog B        | 23.6  | 64.1  | 7.7   | 49.9  | 12.3  | 40.9  |
| <b>XLOC_018203</b> | ZHX3         | zinc fingers and homeoboxes 3                                         | 1.5   | 4.2   | 1.3   | 5.2   | 1.1   | 3.8   |
| <b>XLOC_018329</b> | LHX8         | LIM homeobox 8                                                        | 27.9  | 12.0  | 38.5  | 11.3  | 37.5  | 7.9   |
| <b>XLOC_018439</b> | SMAD3        | SMAD family member 3                                                  | 25.8  | 31.4  | 19.3  | 36.8  | 25.2  | 30.5  |
| <b>XLOC_018440</b> | SMAD6        | SMAD family member 6                                                  | 7.6   | 13.5  | 7.8   | 11.4  | 7.9   | 12.2  |
| <b>XLOC_018590</b> | NF1          | neurofibromin 1                                                       | 7.6   | 8.3   | 4.9   | 8.2   | 8.1   | 8.2   |
| <b>XLOC_018632</b> | NF1          | neurofibromin 1                                                       | 8.1   | 21.3  | 23.7  | 18.0  | 103.3 | 17.3  |
| <b>XLOC_018633</b> | NF1          | neurofibromin 1                                                       | 79.7  | 17.3  | 23.8  | 20.3  | 50.0  | 12.1  |
| <b>XLOC_018648</b> | LHX1         | LIM homeobox 1                                                        | 1.2   | 0.3   | 1.5   | 0.1   | 0.8   | 0.3   |
| <b>XLOC_018651</b> | PSIP1        | PC4 and SFRS1 interacting protein 1                                   | 160.7 | 59.5  | 131.4 | 53.7  | 188.8 | 72.7  |
| <b>XLOC_018657</b> | NFIB         | nuclear factor IB                                                     | 6.5   | 8.1   | 3.9   | 8.0   | 5.1   | 9.0   |
| <b>XLOC_018682</b> | RIPK1        | receptor (TNFRSF)-interacting serine-threonine kinase 1               | 31.7  | 17.1  | 21.4  | 20.7  | 21.6  | 21.5  |
| <b>XLOC_018697</b> | LOC106043843 | forkhead box protein F2-like                                          | 0.0   | 0.0   | 0.0   | 0.1   | 0.0   | 0.0   |

|                    |              |                                                                              |       |       |       |       |       |       |
|--------------------|--------------|------------------------------------------------------------------------------|-------|-------|-------|-------|-------|-------|
| <b>XLOC_018699</b> | IRF4         | interferon regulatory factor 4                                               | 1.1   | 1.3   | 2.2   | 0.8   | 1.3   | 0.9   |
| <b>XLOC_018729</b> | NR4A2        | "nuclear receptor subfamily 4, group A, member 2"                            | 1.0   | 0.5   | 1.5   | 0.5   | 0.7   | 0.5   |
| <b>XLOC_018767</b> | XBP1         | X-box binding protein 1                                                      | 132.5 | 234.1 | 175.8 | 232.3 | 170.0 | 262.5 |
| <b>XLOC_018853</b> | NAAA         | N-acylethanolamine acid amidase                                              | 166.3 | 34.8  | 42.6  | 57.3  | 22.7  | 52.0  |
| <b>XLOC_018912</b> | OTX2         | orthodenticle homeobox 2                                                     | 43.1  | 3.3   | 20.2  | 3.2   | 8.3   | 2.1   |
| <b>XLOC_018914</b> | TBPL2        | TATA box binding protein like 2                                              | 29.6  | 5.3   | 18.6  | 7.1   | 9.0   | 3.6   |
| <b>XLOC_018992</b> | GTF3C4       | "general transcription factor IIIC, polypeptide 4, 90kDa"                    | 32.3  | 11.7  | 21.7  | 9.6   | 18.8  | 9.3   |
| <b>XLOC_019050</b> | REXO4        | "REX4 homolog, 3'-5' exonuclease"                                            | 328.3 | 80.0  | 153.7 | 85.5  | 72.5  | 89.3  |
|                    | RORB         | RAR-related orphan receptor B                                                |       |       | 0.0   | 0.0   | 0.0   | 0.0   |
| <b>XLOC_019252</b> | PEX14        | peroxisomal biogenesis factor 14                                             | 7.7   | 9.1   | 6.7   | 9.0   | 8.0   | 8.9   |
| <b>XLOC_019272</b> | RERE         | arginine-glutamic acid dipeptide (RE) repeats                                | 86.6  | 12.2  | 16.4  | 14.3  | 8.4   | 10.8  |
| <b>XLOC_019313</b> | SFRP4        | secreted frizzled-related protein 4                                          | 7.4   | 65.6  | 8.3   | 86.3  | 11.3  | 72.7  |
| <b>XLOC_019332</b> | KAT6A        | K(lysine) acetyltransferase 6A                                               | 15.5  | 13.3  | 10.7  | 12.8  | 9.2   | 12.9  |
| <b>XLOC_019334</b> | NKX6-3       | NK6 homeobox 3                                                               | 157.2 | 14.2  | 70.9  | 32.2  | 11.5  | 9.6   |
| <b>XLOC_019366</b> | LZTS1        | "leucine zipper, putative tumor suppressor 1"                                | 0.1   | 0.8   | 0.1   | 0.5   | 1.4   | 0.7   |
| <b>XLOC_019370</b> | IKBKB        | "inhibitor of kappa light polypeptide gene enhancer in B-cells, kinase beta" | 77.3  | 33.8  | 55.2  | 35.2  | 42.0  | 37.0  |
| <b>XLOC_019405</b> | LZTS1        | "leucine zipper, putative tumor suppressor 1"                                | 35.8  | 24.3  | 19.9  | 18.1  | 10.0  | 19.5  |
| <b>XLOC_019485</b> | GCFC2        | GC-rich sequence DNA-binding factor 2                                        | 23.3  | 9.9   | 18.0  | 9.3   | 16.4  | 8.9   |
| <b>XLOC_019547</b> | GTF2A1       | "general transcription factor IIA, 1, 1937kDa"                               | 9.1   | 11.8  | 8.8   | 13.2  | 9.5   | 15.1  |
| <b>XLOC_019618</b> | LOC106044620 | transcription factor HES-5-like                                              | 0.8   | 0.9   | 1.0   | 0.6   | 1.4   | 0.6   |
| <b>XLOC_019656</b> | LOC106044624 | transcription factor HES-5-like                                              | 0.1   | 0.1   | 0.3   | 0.1   | 0.1   | 0.1   |
| <b>XLOC_019657</b> | LOC106044623 | transcription factor HES-5-like                                              | 0.0   | 0.0   | 0.0   | 0.0   | 0.1   | 0.1   |
| <b>XLOC_019729</b> | MEIS1        | Meis homeobox 1                                                              | 14.8  | 28.8  | 7.1   | 33.1  | 9.0   | 26.7  |
| <b>XLOC_019745</b> | VSX1         | visual system homeobox 1                                                     | 1.0   | 0.2   | 0.3   | 0.5   | 0.2   | 0.3   |
| <b>XLOC_019828</b> | TP63         | tumor protein p63                                                            | 16.9  | 5.8   | 19.1  | 6.3   | 10.0  | 3.6   |
| <b>XLOC_019884</b> | LOC106044855 | hepatocyte nuclear factor 4-beta-like                                        | 3.4   | 3.9   | 5.1   | 3.9   | 4.4   | 4.0   |



|                    |              |                                                                                    |       |       |       |       |      |       |
|--------------------|--------------|------------------------------------------------------------------------------------|-------|-------|-------|-------|------|-------|
| <b>XLOC_019906</b> | LOC106044841 | forkhead box protein C2-like                                                       | 2.7   | 1.9   | 2.6   | 0.9   | 0.7  | 1.0   |
| <b>XLOC_019940</b> | TCF4         | transcription factor 4                                                             | 0.5   | 1.1   | 0.3   | 1.5   | 0.6  | 1.4   |
| <b>XLOC_019951</b> | MALT1        | MALT1 paracaspase                                                                  | 11.6  | 10.0  | 14.5  | 9.7   | 12.7 | 8.4   |
| <b>XLOC_019965</b> | TCF4         | transcription factor 4                                                             | 9.0   | 21.8  | 5.4   | 24.1  | 5.4  | 23.1  |
| <b>XLOC_019974</b> | RAX          | retina and anterior neural fold homeobox                                           | 0.0   | 0.0   | 0.0   | 0.1   | 0.0  | 0.1   |
| <b>XLOC_020021</b> | CERS4        | ceramide synthase 4                                                                | 14.7  | 16.1  | 19.3  | 11.5  | 13.7 | 14.5  |
| <b>XLOC_020048</b> | UHRF1        | ubiquitin-like with PHD and ring finger domains 1                                  | 49.2  | 17.7  | 36.9  | 19.3  | 36.8 | 32.1  |
| <b>XLOC_020059</b> | CREB3L3      | cAMP responsive element binding protein 3-like 3                                   | 0.3   | 0.2   | 0.0   | 0.3   | 0.1  | 0.3   |
| <b>XLOC_020114</b> | ZXDC         | ZXD family zinc finger C                                                           | 4.2   | 5.1   | 5.0   | 5.8   | 4.2  | 4.6   |
| <b>XLOC_020117</b> | KLF15        | Kruppel-like factor 15                                                             | 14.8  | 11.5  | 20.4  | 9.7   | 9.9  | 7.1   |
| <b>XLOC_020181</b> | NFIL3        | "nuclear factor, interleukin 3 regulated"                                          | 13.9  | 17.0  | 10.9  | 15.6  | 10.1 | 13.4  |
| <b>XLOC_020189</b> | TAF12        | "TAF12 RNA polymerase II, TATA box binding protein (TBP)-associated factor, 20kDa" | 23.2  | 30.2  | 31.1  | 32.0  | 32.6 | 37.0  |
| <b>XLOC_020214</b> | LOC106045119 | transcription factor E2F2-like                                                     | 1.4   | 1.6   | 0.5   | 1.3   | 0.5  | 2.1   |
| <b>XLOC_020215</b> | LOC106045127 | DNA-binding protein inhibitor ID-3-A-like                                          | 142.6 | 378.6 | 130.9 | 644.3 | 72.4 | 543.2 |
| <b>XLOC_020218</b> | TAF12        | "TAF12 RNA polymerase II, TATA box binding protein (TBP)-associated factor, 20kDa" | 32.8  | 2.0   | 6.7   | 0.8   | 0.0  | 0.4   |
| <b>XLOC_020309</b> | VAX1         | ventral anterior homeobox 1                                                        | 2.8   | 1.0   | 2.9   | 0.7   | 1.2  | 0.2   |
| <b>XLOC_020337</b> | EMX2         | empty spiracles homeobox 2                                                         | 38.6  | 24.4  | 38.6  | 20.1  | 21.6 | 18.5  |
| <b>XLOC_020382</b> | SALL1        | spalt-like transcription factor 1                                                  | 12.9  | 15.3  | 13.2  | 11.8  | 11.5 | 11.5  |
| <b>XLOC_020418</b> | CREM         | cAMP responsive element modulator                                                  | 10.3  | 16.5  | 12.9  | 18.2  | 18.2 | 16.0  |
| <b>XLOC_020422</b> | NFKB1        | nuclear factor of kappa light polypeptide gene enhancer in B-cells 1               | 49.8  | 35.3  | 24.7  | 43.0  | 19.4 | 37.2  |
| <b>XLOC_020537</b> | TGIF2        | TGFB-induced factor homeobox 2                                                     | 3.5   | 8.9   | 3.0   | 10.5  | 3.2  | 10.9  |
| <b>XLOC_020540</b> | L3MBTL1      | l(3)mbt-like 1 (Drosophila)                                                        | 0.3   | 0.6   | 0.3   | 0.5   | 0.2  | 0.4   |
| <b>XLOC_020563</b> | NCOA6        | nuclear receptor coactivator 6                                                     | 11.0  | 8.3   | 10.0  | 7.9   | 9.8  | 8.5   |
| <b>XLOC_020566</b> | TGIF2        | TGFB-induced factor homeobox 2                                                     | 0.8   | 1.6   | 0.7   | 1.6   | 0.9  | 1.5   |
| <b>XLOC_020567</b> | TGIF2        | TGFB-induced factor homeobox 2                                                     | 17.0  | 13.0  | 7.1   | 13.1  | 11.3 | 12.8  |
| <b>XLOC_020574</b> | ITCH         | itchy E3 ubiquitin protein ligase                                                  | 4.4   | 7.8   | 4.4   | 7.5   | 9.5  | 8.2   |

|                    |              |                                                                            |       |       |       |       |       |       |
|--------------------|--------------|----------------------------------------------------------------------------|-------|-------|-------|-------|-------|-------|
| <b>XLOC_020584</b> | TLE4         | transducin-like enhancer of split 4                                        | 3.6   | 6.4   | 4.4   | 8.3   | 8.1   | 8.3   |
| <b>XLOC_020593</b> | TLE1         | "transducin-like enhancer of split 1 (E(sp1) homolog, Drosophila)"         | 9.8   | 12.5  | 8.6   | 14.4  | 11.3  | 15.7  |
| <b>XLOC_020605</b> | NOBOX        | NOBOX oogenesis homeobox                                                   | 8.8   | 1.9   | 6.6   | 2.4   | 2.4   | 1.0   |
| <b>XLOC_020674</b> | EDA2R        | ectodysplasin A2 receptor                                                  | 8.8   | 17.9  | 12.8  | 18.8  | 13.4  | 17.4  |
| <b>XLOC_020675</b> | LOC106045553 | heat shock factor protein 3-like                                           | 25.3  | 28.6  | 31.9  | 27.2  | 29.3  | 26.5  |
| <b>XLOC_020701</b> | AR           | androgen receptor                                                          | 19.3  | 29.9  | 19.7  | 42.5  | 23.9  | 35.3  |
| <b>XLOC_020737</b> | OTX1         | orthodenticle homeobox 1                                                   | 0.5   | 0.5   | 0.6   | 0.1   | 0.0   | 0.5   |
| <b>XLOC_020785</b> | LOC106045650 | nuclear receptor ROR-beta-like                                             | 2.0   | 0.3   | 2.0   | 0.2   | 0.4   | 0.2   |
| <b>XLOC_020816</b> | LOC106045683 | mucosa-associated lymphoid tissue lymphoma translocation protein 1-like    | 0.8   | 1.2   | 0.4   | 1.9   | 0.2   | 1.4   |
| <b>XLOC_020819</b> | HMG20B       | high mobility group 20B                                                    | 177.2 | 148.1 | 221.7 | 159.2 | 103.9 | 146.5 |
| <b>XLOC_020823</b> | NFIC         | nuclear factor IC (CCAAT-binding transcription factor)                     | 16.1  | 80.5  | 14.5  | 81.3  | 15.9  | 76.6  |
| <b>XLOC_020829</b> | TCF3         | transcription factor 3                                                     | 11.3  | 17.0  | 9.5   | 19.4  | 7.0   | 19.9  |
| <b>XLOC_020847</b> | TBX15        | T-box 15                                                                   | 0.0   | 0.1   | 0.0   | 0.0   | 0.0   | 0.0   |
| <b>XLOC_020867</b> | LOC106045720 | glycogen synthase kinase-3 beta-like                                       | 205.2 | 37.9  | 57.0  | 61.4  | 37.3  | 60.9  |
| <b>XLOC_020963</b> | TFEB         | transcription factor EB                                                    | 1.2   | 4.0   | 1.7   | 4.6   | 0.7   | 4.3   |
| <b>XLOC_020993</b> | BTG2         | "BTG family, member 2"                                                     | 63.2  | 73.6  | 77.3  | 114.9 | 66.2  | 62.9  |
| <b>XLOC_021002</b> | MDFI         | MyoD family inhibitor                                                      | 1.3   | 18.7  | 0.7   | 27.3  | 0.4   | 20.3  |
| <b>XLOC_021005</b> | FOXP4        | forkhead box P4                                                            | 5.9   | 9.2   | 7.9   | 8.7   | 7.1   | 9.4   |
| <b>XLOC_021020</b> | LZTR1        | leucine-zipper-like transcription regulator 1                              | 34.5  | 18.4  | 39.6  | 15.8  | 32.3  | 15.7  |
| <b>XLOC_021257</b> | HOPX         | HOP homeobox                                                               | 0.4   | 1.2   | 0.2   | 1.1   | 0.7   | 1.3   |
| <b>XLOC_021259</b> | REST         | RE1-silencing transcription factor                                         | 8.0   | 13.7  | 5.7   | 14.4  | 19.5  | 17.0  |
| <b>XLOC_021313</b> | PPARD        | peroxisome proliferator-activated receptor delta                           | 9.4   | 14.7  | 11.9  | 15.9  | 7.9   | 14.6  |
| <b>XLOC_021324</b> | MAPK14       | mitogen-activated protein kinase 14                                        | 119.7 | 67.5  | 138.1 | 64.8  | 109.7 | 62.4  |
| <b>XLOC_021332</b> | ELF3         | "E74-like factor 3 (ets domain transcription factor, epithelial-specific)" | 6.4   | 5.1   | 7.3   | 13.8  | 2.5   | 13.1  |
| <b>XLOC_021343</b> | NFYA         | "nuclear transcription factor Y, alpha"                                    | 10.9  | 15.9  | 14.1  | 15.5  | 22.0  | 15.8  |
| <b>XLOC_021484</b> | MXD1         | MAX dimerization protein 1                                                 | 16.4  | 10.1  | 11.8  | 12.1  | 6.6   | 10.1  |

|                    |              |                                                                           |       |       |       |       |      |       |
|--------------------|--------------|---------------------------------------------------------------------------|-------|-------|-------|-------|------|-------|
| <b>XLOC_021556</b> | UBN1         | ubinnuclein 1                                                             | 10.4  | 6.2   | 7.1   | 6.1   | 6.3  | 5.3   |
| <b>XLOC_021681</b> | TFDP1        | transcription factor Dp-1                                                 | 6.1   | 12.7  | 6.0   | 16.3  | 10.6 | 22.7  |
| <b>XLOC_021707</b> | NFX1         | "nuclear transcription factor, X-box binding 1"                           | 16.6  | 14.2  | 27.0  | 12.4  | 31.1 | 11.8  |
| <b>XLOC_021744</b> | ZFPM1        | "zinc finger protein, FOG family member 1"                                | 64.5  | 36.5  | 53.2  | 31.0  | 28.0 | 34.4  |
| <b>XLOC_021772</b> | CBFA2T3      | "core-binding factor, runt domain, alpha subunit 2%3B translocated to, 3" | 0.3   | 2.4   | 0.2   | 2.4   | 0.1  | 2.4   |
| <b>XLOC_021843</b> | SCMH1        | sex comb on midleg homolog 1 (Drosophila)                                 | 19.6  | 11.4  | 13.0  | 12.4  | 7.1  | 11.1  |
| <b>XLOC_021857</b> | NFAT5        | "nuclear factor of activated T-cells 5, tonicity-responsive"              | 4.3   | 9.1   | 3.3   | 7.9   | 6.8  | 7.9   |
| <b>XLOC_021858</b> | WWP2         | WW domain containing E3 ubiquitin protein ligase 2                        | 19.3  | 13.1  | 13.5  | 14.3  | 6.5  | 13.1  |
| <b>XLOC_021863</b> | ZFH3         | zinc finger homeobox 3                                                    | 1.5   | 2.6   | 1.9   | 2.7   | 1.1  | 2.3   |
| <b>XLOC_021893</b> | TERF2IP      | "telomeric repeat binding factor 2, interacting protein"                  | 12.7  | 8.6   | 10.2  | 8.1   | 13.6 | 9.7   |
| <b>XLOC_021897</b> | NOD1         | nucleotide-binding oligomerization domain containing 1                    | 1.4   | 3.5   | 1.4   | 4.0   | 2.8  | 3.4   |
|                    | TBX4         | T-box 4                                                                   |       |       |       |       | 0.0  | 0.0   |
| <b>XLOC_022151</b> | TBX2         | T-box 2                                                                   | 1.0   | 13.6  | 0.1   | 12.9  | 0.3  | 14.6  |
| <b>XLOC_022223</b> | PSMC5        | "proteasome (prosome, macropain) 26S subunit, ATPase, 5"                  | 114.5 | 133.4 | 111.5 | 131.5 | 89.7 | 160.8 |
| <b>XLOC_022326</b> | TRAF3        | TNF receptor-associated factor 3                                          | 6.2   | 2.0   | 4.3   | 2.5   | 2.8  | 1.7   |
| <b>XLOC_022328</b> | RCOR1        | REST corepressor 1                                                        | 5.6   | 11.1  | 6.0   | 13.3  | 17.3 | 13.8  |
| <b>XLOC_022351</b> | IGHMBP2      | immunoglobulin mu binding protein 2                                       | 0.5   | 0.2   | 0.1   | 1.2   | 0.0  | 0.2   |
| <b>XLOC_022386</b> | SIGIRR       | single immunoglobulin and toll-interleukin 1 receptor (TIR) domain        | 0.8   | 0.9   | 1.5   | 0.8   | 0.7  | 0.7   |
| <b>XLOC_022388</b> | IGHMBP2      | immunoglobulin mu binding protein 2                                       | 10.1  | 13.4  | 17.1  | 12.7  | 15.3 | 11.4  |
| <b>XLOC_022455</b> | FOXP2        | forkhead box K2                                                           | 57.8  | 26.6  | 34.6  | 30.7  | 25.1 | 30.1  |
| <b>XLOC_022508</b> | LOC106047120 | interferon regulatory factor 4-like                                       | 1.1   | 2.1   | 0.0   | 1.5   | 0.4  | 3.0   |
| <b>XLOC_022512</b> | PLAGL2       | pleiomorphic adenoma gene-like 2                                          | 1.9   | 2.1   | 2.5   | 2.0   | 2.2  | 2.0   |
| <b>XLOC_022544</b> | MYOCD        | myocardin                                                                 | 2.3   | 6.7   | 2.6   | 5.6   | 3.8  | 5.8   |
| <b>XLOC_022650</b> | PRRX2        | paired related homeobox 2                                                 | 0.4   | 1.2   | 0.1   | 1.2   | 0.1  | 1.1   |
| <b>XLOC_022677</b> | NKX6-2       | NK6 homeobox 2                                                            | 34.0  | 2.1   | 10.3  | 4.9   | 3.0  | 3.7   |
| <b>XLOC_022850</b> | LOC106047451 | mucosa-associated lymphoid tissue lymphoma translocation protein 1-like   | 23.9  | 14.0  | 12.6  | 16.5  | 12.1 | 16.9  |

|                    |              |                                                                                  |       |       |       |       |       |       |
|--------------------|--------------|----------------------------------------------------------------------------------|-------|-------|-------|-------|-------|-------|
| <b>XLOC_022925</b> | LOC106047487 | brain-specific homeoboxPOU domain protein 3                                      | 12.2  | 1.8   | 5.5   | 1.0   | 1.8   | 0.8   |
| <b>XLOC_022959</b> | NPAT         | "nuclear protein, ataxia-telangiectasia locus"                                   | 10.5  | 6.7   | 8.2   | 7.5   | 7.0   | 6.3   |
| <b>XLOC_022966</b> | MEF2C        | myocyte enhancer factor 2C                                                       | 18.3  | 11.6  | 9.4   | 10.5  | 13.1  | 11.3  |
| <b>XLOC_023103</b> | TSC22D2      | "TSC22 domain family, member 2"                                                  | 29.2  | 22.4  | 27.8  | 25.7  | 19.8  | 24.4  |
| <b>XLOC_023104</b> | LOC106047670 | TSC22 domain family protein 2-like                                               | 101.4 | 80.2  | 87.8  | 99.0  | 39.8  | 120.1 |
| <b>XLOC_023126</b> | DIP2B        | disco-interacting protein 2 homolog B                                            | 10.9  | 12.3  | 13.6  | 10.9  | 16.2  | 11.2  |
| <b>XLOC_023127</b> | ATF1         | activating transcription factor 1                                                | 16.1  | 46.5  | 26.5  | 49.9  | 26.4  | 55.1  |
| <b>XLOC_023136</b> | ATG101       | autophagy related 101                                                            | 79.7  | 71.6  | 96.1  | 69.3  | 65.2  | 72.1  |
| <b>XLOC_023175</b> | TOX2         | TOX high mobility group box family member 2                                      | 22.9  | 15.4  | 24.8  | 10.4  | 30.0  | 13.9  |
| <b>XLOC_023226</b> | PBX1         | pre-B-cell leukemia homeobox 1                                                   | 67.3  | 67.9  | 23.3  | 86.5  | 10.4  | 79.7  |
| <b>XLOC_023229</b> | ZNF648       | zinc finger protein 648                                                          | 22.6  | 27.3  | 25.6  | 29.8  | 16.0  | 30.8  |
| <b>XLOC_023282</b> | CHD4         | chromodomain helicase DNA binding protein 4                                      | 125.5 | 56.3  | 129.2 | 56.8  | 77.4  | 45.2  |
| <b>XLOC_023370</b> | NR0B2        | "nuclear receptor subfamily O, group B, member 2"                                | 5.2   | 5.5   | 6.7   | 4.1   | 12.3  | 4.6   |
| <b>XLOC_023395</b> | RFXANK       | regulatory factor X-associated ankyrin-containing protein                        | 7.8   | 17.7  | 9.4   | 19.3  | 7.4   | 18.0  |
| <b>XLOC_023399</b> | GATAD2A      | GATA zinc finger domain containing 2A                                            | 8.1   | 6.9   | 4.6   | 8.3   | 4.0   | 7.6   |
| <b>XLOC_023481</b> | LOC106047988 | uncharacterized LOC106047988                                                     | 6.5   | 11.5  | 7.0   | 14.2  | 6.0   | 14.2  |
| <b>XLOC_023486</b> | LOC106047991 | signal transducer and activator of transcription 5A-like                         | 13.4  | 26.4  | 11.6  | 32.1  | 10.8  | 27.5  |
| <b>XLOC_023487</b> | STAT3        | signal transducer and activator of transcription 3 (acute-phase response factor) | 44.3  | 78.4  | 41.0  | 109.1 | 20.8  | 84.0  |
|                    | PHOX2B       | paired-like homeobox 2b                                                          |       |       | 0.0   | 0.2   |       |       |
| <b>XLOC_023547</b> | LOC106048073 | homeobox protein NANOG-like                                                      | 0.0   | 0.0   | 0.0   | 0.0   | 0.0   | 0.0   |
| <b>XLOC_023562</b> | FOXJ2        | forkhead box J2                                                                  | 34.5  | 26.5  | 22.0  | 27.3  | 16.9  | 27.8  |
| <b>XLOC_023563</b> | LOC106048065 | homeobox protein NANOG-like                                                      | 23.7  | 7.0   | 25.3  | 8.8   | 15.0  | 3.7   |
| <b>XLOC_023605</b> | FOXM1        | forkhead box M1                                                                  | 28.9  | 9.5   | 33.6  | 9.8   | 23.2  | 10.1  |
| <b>XLOC_023726</b> | TRAPPC2      | trafficking protein particle complex 2                                           | 92.7  | 152.7 | 164.8 | 176.2 | 225.6 | 160.2 |
| <b>XLOC_023780</b> | MYRF         | myelin regulatory factor                                                         | 8.6   | 17.9  | 6.9   | 17.2  | 6.3   | 20.9  |
| <b>XLOC_023817</b> | SNF8         | "SNF8, ESCRT-II complex subunit"                                                 | 61.6  | 45.8  | 77.5  | 47.4  | 58.1  | 57.9  |

|                    |              |                                                                                          |      |      |      |      |      |      |
|--------------------|--------------|------------------------------------------------------------------------------------------|------|------|------|------|------|------|
| <b>XLOC_023823</b> | HOXB9        | homeobox B9                                                                              | 4.4  | 5.0  | 1.5  | 5.6  | 1.4  | 5.9  |
| <b>XLOC_023824</b> | HOXB8        | homeobox B8                                                                              | 0.4  | 0.6  | 0.2  | 1.0  | 0.4  | 0.4  |
| <b>XLOC_023825</b> | HOXB7        | homeobox B7                                                                              | 5.7  | 8.4  | 2.0  | 8.1  | 4.0  | 8.9  |
| <b>XLOC_023826</b> | HOXB6        | homeobox B6                                                                              | 4.4  | 14.0 | 2.7  | 13.0 | 3.2  | 13.1 |
| <b>XLOC_023832</b> | HOXB4        | homeobox B4                                                                              | 11.1 | 22.0 | 5.6  | 23.9 | 3.6  | 21.5 |
| <b>XLOC_023834</b> | HOXB3        | homeobox B3                                                                              | 1.3  | 2.7  | 0.7  | 2.4  | 0.7  | 2.3  |
| <b>XLOC_023835</b> | HOXB2        | homeobox B2                                                                              | 1.1  | 1.4  | 0.6  | 1.2  | 0.1  | 1.0  |
| <b>XLOC_023847</b> | NFE2L1       | "nuclear factor, erythroid 2-like 1"                                                     | 24.7 | 28.2 | 22.5 | 29.2 | 14.9 | 28.0 |
| <b>XLOC_023921</b> | LOC106048406 | nuclear factor interleukin-3-regulated protein                                           | 0.0  | 0.0  | 0.0  | 0.1  | 0.0  | 0.0  |
| <b>XLOC_024145</b> | LOC106048608 | zinc finger and SCAN domain-containing protein 29                                        | 4.0  | 1.1  | 1.7  | 1.3  | 1.1  | 1.2  |
| <b>XLOC_024238</b> | POU6F1       | POU class 6 homeobox 1                                                                   | 0.5  | 4.5  | 0.2  | 3.1  | 0.3  | 4.1  |
| <b>XLOC_024239</b> | TFCP2        | transcription factor CP2                                                                 | 53.5 | 51.2 | 45.1 | 59.2 | 33.5 | 53.0 |
| <b>XLOC_024240</b> | CSRNP2       | cysteine-serine-rich nuclear protein 2                                                   | 7.7  | 11.6 | 5.1  | 12.7 | 3.8  | 10.0 |
| <b>XLOC_024345</b> | SOST         | sclerostin                                                                               | 3.6  | 1.0  | 3.0  | 0.6  | 1.8  | 0.7  |
| <b>XLOC_024346</b> | MEOX1        | mesenchyme homeobox 1                                                                    | 0.2  | 0.2  | 0.0  | 0.4  | 0.0  | 0.3  |
| <b>XLOC_024347</b> | ETV4         | ets variant 4                                                                            | 3.1  | 2.2  | 3.7  | 2.2  | 1.3  | 1.3  |
| <b>XLOC_024360</b> | LOC106048786 | ras-related protein Rab-18-B-like                                                        | 20.9 | 14.0 | 11.5 | 21.8 | 14.8 | 22.7 |
| <b>XLOC_024364</b> | ETV4         | ets variant 4                                                                            | 5.2  | 0.0  | 0.5  | 0.1  | 0.0  | 0.1  |
| <b>XLOC_024377</b> | TAF5L        | "TAF5-like RNA polymerase II, p300CBP-associated factor (PCAF)-associated factor, 65kDa" | 21.4 | 14.2 | 19.5 | 16.4 | 10.7 | 13.7 |
| <b>XLOC_024389</b> | LOC106048825 | iroquois-class homeodomain protein IRX-4-like                                            | 1.7  | 1.5  | 3.3  | 1.5  | 2.1  | 0.7  |
| <b>XLOC_024448</b> | ATF7         | activating transcription factor 7                                                        | 1.4  | 3.4  | 1.7  | 3.7  | 1.3  | 4.1  |
| <b>XLOC_024453</b> | HOXC4        | homeobox C4                                                                              | 0.9  | 1.0  | 0.2  | 0.8  | 0.3  | 0.8  |
| <b>XLOC_024454</b> | HOXC5        | homeobox C5                                                                              | 0.7  | 4.1  | 0.4  | 2.7  | 0.4  | 2.4  |
| <b>XLOC_024456</b> | LOC106048882 | homeobox protein Hox-C6                                                                  | 8.1  | 38.2 | 5.6  | 36.2 | 5.6  | 31.0 |
| <b>XLOC_024460</b> | HOXC8        | homeobox C8                                                                              | 2.6  | 9.9  | 0.4  | 11.4 | 1.5  | 9.5  |
| <b>XLOC_024461</b> | HOXC9        | homeobox C9                                                                              | 1.6  | 4.6  | 0.4  | 5.9  | 0.8  | 7.2  |

|                    |              |                                                                                                    |      |      |       |      |      |      |
|--------------------|--------------|----------------------------------------------------------------------------------------------------|------|------|-------|------|------|------|
| <b>XLOC_024462</b> | HOXC10       | homeobox C10                                                                                       | 0.2  | 0.1  | 0.0   | 0.1  | 0.3  | 1.2  |
|                    | HOXC11       | homeobox C11                                                                                       |      |      | 0.0   | 0.0  |      |      |
| <b>XLOC_024465</b> | HOXC13       | homeobox C13                                                                                       | 0.5  | 0.0  | 0.6   | 0.0  | 0.2  | 0.0  |
| <b>XLOC_024513</b> | IRF5         | interferon regulatory factor 5                                                                     | 4.2  | 5.5  | 5.4   | 4.3  | 4.4  | 4.4  |
| <b>XLOC_024521</b> | NRF1         | nuclear respiratory factor 1                                                                       | 11.9 | 12.6 | 8.5   | 9.6  | 7.1  | 7.6  |
| <b>XLOC_024564</b> | LOC106048963 | myocyte-specific enhancer factor 2D-like                                                           | 2.3  | 9.6  | 4.1   | 10.9 | 2.9  | 11.0 |
| <b>XLOC_024613</b> | NAB2         | NGFI-A binding protein 2 (EGR1 binding protein 2)                                                  | 2.4  | 4.5  | 1.0   | 4.5  | 0.8  | 4.9  |
| <b>XLOC_024643</b> | STAT6        | "signal transducer and activator of transcription 6, interleukin-4 induced"                        | 13.4 | 28.6 | 18.1  | 27.5 | 14.6 | 26.5 |
| <b>XLOC_024654</b> | SMARCD3      | "SWISNF related, matrix associated, actin dependent regulator of chromatin, subfamily d, member 3" | 9.7  | 13.5 | 14.6  | 12.8 | 17.6 | 12.9 |
| <b>XLOC_024731</b> | NPAS2        | neuronal PAS domain protein 2                                                                      | 1.0  | 3.0  | 0.9   | 3.3  | 0.9  | 3.5  |
| <b>XLOC_024769</b> | GATAD2B      | GATA zinc finger domain containing 2B                                                              | 27.4 | 23.7 | 28.9  | 23.7 | 21.2 | 23.3 |
| <b>XLOC_024839</b> | FOXN1        | forkhead box N1                                                                                    | 1.9  | 0.3  | 1.7   | 0.2  | 1.0  | 0.1  |
| <b>XLOC_024925</b> | IRF8         | interferon regulatory factor 8                                                                     | 22.8 | 27.9 | 28.8  | 32.7 | 16.4 | 27.8 |
| <b>XLOC_024940</b> | CERS2        | ceramide synthase 2                                                                                | 58.6 | 55.2 | 69.0  | 51.5 | 55.3 | 51.5 |
| <b>XLOC_024942</b> | ARNT         | aryl hydrocarbon receptor nuclear translocator                                                     | 24.0 | 37.8 | 32.5  | 36.0 | 30.0 | 35.1 |
| <b>XLOC_025013</b> | LOC106049319 | E3 ubiquitin-protein ligase RNF19B-like                                                            | 3.5  | 9.8  | 3.4   | 9.7  | 4.2  | 8.0  |
| <b>XLOC_025069</b> | SCRT2        | scratch family zinc finger 2                                                                       | 0.7  | 0.2  | 0.4   | 0.4  | 0.0  | 0.1  |
| <b>XLOC_025086</b> | LOC106049386 | general transcription factor IIH subunit 2                                                         | 16.2 | 8.6  | 14.1  | 8.8  | 12.1 | 10.1 |
| <b>XLOC_025180</b> | HSF1         | heat shock transcription factor 1                                                                  | 59.5 | 51.3 | 108.5 | 60.8 | 82.1 | 61.8 |
| <b>XLOC_025192</b> | LOC106049483 | LIM homeobox transcription factor 1-alpha-like                                                     | 3.3  | 3.2  | 2.7   | 2.9  | 2.0  | 3.0  |
| <b>XLOC_025204</b> | PBX4         | pre-B-cell leukemia homeobox 4                                                                     | 28.0 | 14.8 | 18.8  | 19.7 | 12.1 | 19.2 |
| <b>XLOC_025224</b> | LOC106049496 | PR domain zinc finger protein 5-like                                                               | 2.7  | 3.4  | 1.7   | 4.3  | 1.5  | 3.9  |
| <b>XLOC_025255</b> | LOC106049528 | uncharacterized LOC106049528                                                                       | 19.7 | 79.3 | 24.0  | 74.6 | 20.3 | 55.3 |
| <b>XLOC_025262</b> | HDAC8        | histone deacetylase 8                                                                              | 19.1 | 25.9 | 28.9  | 22.9 | 24.8 | 26.4 |
| <b>XLOC_025315</b> | LOC106049581 | transcription factor Sp1-like                                                                      | 9.0  | 17.6 | 6.2   | 17.8 | 7.5  | 21.2 |
| <b>XLOC_025317</b> | VDR          | "vitamin D (1,25- dihydroxyvitamin D3) receptor"                                                   | 9.4  | 3.3  | 9.0   | 4.6  | 3.6  | 3.6  |

|                    |              |                                                                                   |       |      |       |       |       |       |
|--------------------|--------------|-----------------------------------------------------------------------------------|-------|------|-------|-------|-------|-------|
| <b>XLOC_025336</b> | ISL1         | ISL LIM homeobox 1                                                                | 0.3   | 0.1  | 0.3   | 0.0   | 0.4   | 0.0   |
| <b>XLOC_025360</b> | LOC106049620 | platelet glycoprotein VI-like                                                     | 0.4   | 0.5  | 0.3   | 0.2   | 0.3   | 0.2   |
| <b>XLOC_025452</b> | LOC106049689 | uncharacterized LOC106049689                                                      | 1.6   | 0.2  | 0.5   | 0.2   | 0.1   | 0.1   |
| <b>XLOC_025499</b> | KAT7         | K(lysine) acetyltransferase 7                                                     | 34.7  | 25.9 | 40.7  | 22.8  | 42.1  | 24.5  |
|                    | LOC106049761 | E3 ubiquitin-protein ligase TRIM39-like                                           |       |      | 0.1   | 0.0   | 0.0   | 0.0   |
| <b>XLOC_025525</b> | LOC106049750 | zinc finger protein 883-like                                                      | 4.4   | 7.1  | 4.8   | 7.1   | 4.5   | 6.6   |
| <b>XLOC_025546</b> | TP53BP1      | tumor protein p53 binding protein 1                                               | 408.2 | 34.4 | 81.1  | 40.6  | 61.2  | 41.8  |
| <b>XLOC_025550</b> | DNMT1        | DNA (cytosine-5-)-methyltransferase 1                                             | 14.0  | 24.9 | 11.3  | 29.7  | 10.9  | 29.6  |
| <b>XLOC_025729</b> | GTF3C2       | "general transcription factor IIIC, polypeptide 2, beta 110kDa"                   | 18.5  | 18.9 | 20.6  | 18.0  | 14.4  | 18.6  |
| <b>XLOC_025887</b> | LOC106029359 | uncharacterized LOC106029359                                                      | 4.5   | 11.9 | 4.6   | 9.3   | 5.0   | 10.3  |
| <b>XLOC_025888</b> | PA2G4        | "proliferation-associated 2G4, 38kDa"                                             | 118.4 | 83.0 | 123.7 | 77.8  | 103.1 | 102.5 |
| <b>XLOC_026016</b> | TAF6         | "TAF6 RNA polymerase II, TATA box binding protein (TBP)-associated factor, 80kDa" | 11.4  | 21.0 | 14.5  | 19.4  | 10.5  | 22.9  |
| <b>XLOC_026083</b> | LOC106029471 | transcription activator BRG1                                                      | 121.3 | 76.0 | 134.3 | 80.4  | 72.7  | 77.8  |
| <b>XLOC_026149</b> | LOC106029507 | proto-oncogene c-Fos-like                                                         | 20.0  | 2.5  | 9.0   | 3.2   | 1.1   | 1.7   |
| <b>XLOC_026439</b> | LOC106029618 | chromobox protein homolog 5-like                                                  | 186.6 | 81.9 | 73.1  | 108.8 | 49.1  | 152.6 |

Table S8 Analysis of autophagy-related genes during the period between egg-laying and broody goose follicles

| gene_id     |              |                                                                          | LSWF  | BSWF  | LLWF  | BLWF  | LSYF  | BSYF  |
|-------------|--------------|--------------------------------------------------------------------------|-------|-------|-------|-------|-------|-------|
| XLOC_002484 | MAP1LC3C     | microtubule-associated protein 1 light chain 3 gamma                     | 9.6   | 6.9   | 16.4  | 5.6   | 18.4  | 6.3   |
| XLOC_003943 | DRAM1        | DNA-damage regulated autophagy modulator 1                               | 9.2   | 15.4  | 12.3  | 26.3  | 28.6  | 17.8  |
| XLOC_004075 | DRAM1        | DNA-damage regulated autophagy modulator 1                               | 5.4   | 2.1   | 5.2   | 2.1   | 5.6   | 2.6   |
| XLOC_004173 | ULK1         | unc-51 like autophagy activating kinase 1                                | 6.4   | 7.8   | 10.9  | 7.5   | 14.5  | 6.4   |
| XLOC_004463 | LOC106031353 | "dynein light chain 1, cytoplasmic-like"                                 | 1.7   | 2.5   | 1.3   | 2.8   | 1.4   | 3.8   |
| XLOC_005977 | SQSTM1       | sequestosome 1                                                           | 200.9 | 162.6 | 260.0 | 140.4 | 205.5 | 133.1 |
| XLOC_007973 | WIPI1        | "WD repeat domain, phosphoinositide interacting 1"                       | 44.2  | 26.6  | 39.7  | 27.5  | 25.2  | 25.0  |
| XLOC_008698 | MTDH         | metadherin                                                               | 40.0  | 45.6  | 34.4  | 51.6  | 42.0  | 57.9  |
| XLOC_008801 | TMEM74       | transmembrane protein 74                                                 | 0.3   | 0.3   | 0.3   | 0.8   | 0.4   | 0.4   |
| XLOC_009913 | PRKAA1       | "protein kinase, AMP-activated, alpha 1 catalytic subunit"               | 28.4  | 16.5  | 32.9  | 20.7  | 26.2  | 16.7  |
| XLOC_010234 | DAP          | death-associated protein                                                 | 96.9  | 153.0 | 144.3 | 168.6 | 407.5 | 195.6 |
| XLOC_011156 | EPG5         | ectopic P-granules autophagy protein 5 homolog (C. elegans)              | 14.4  | 9.5   | 16.3  | 8.3   | 18.0  | 9.2   |
| XLOC_012439 | RB1CC1       | RB1-inducible coiled-coil 1                                              | 60.0  | 23.5  | 46.0  | 23.9  | 43.9  | 20.8  |
| XLOC_012611 | ATG4A        | "autophagy related 4A, cysteine peptidase"                               | 20.2  | 34.7  | 20.9  | 31.0  | 25.0  | 30.8  |
| XLOC_014275 | ATG7         | autophagy related 7                                                      | 5.9   | 6.9   | 6.3   | 6.7   | 6.4   | 7.3   |
| XLOC_014516 | PIK3CB       | "phosphatidylinositol-4,5-bisphosphate 3-kinase, catalytic subunit beta" | 22.5  | 6.8   | 7.0   | 8.7   | 5.6   | 8.9   |
| XLOC_014592 | ATG16L1      | autophagy related 16-like 1                                              | 85.5  | 56.6  | 83.8  | 57.8  | 55.4  | 56.8  |
| XLOC_015157 | RGS19        | regulator of G-protein signaling 19                                      | 26.0  | 61.0  | 13.5  | 77.2  | 10.4  | 69.4  |
| XLOC_016515 | LRRK2        | leucine-rich repeat kinase 2                                             | 1.9   | 5.2   | 1.8   | 5.3   | 4.0   | 5.8   |
| XLOC_016948 | UVRAG        | UV radiation resistance associated                                       | 120.3 | 49.3  | 136.7 | 48.8  | 95.1  | 35.5  |
| XLOC_017352 | ATG10        | autophagy related 10                                                     | 9.1   | 6.7   | 11.3  | 7.6   | 10.6  | 8.6   |



---

|                    |              |                                                                  |       |       |       |       |       |       |
|--------------------|--------------|------------------------------------------------------------------|-------|-------|-------|-------|-------|-------|
| <b>XLOC_018915</b> | ATG14        | autophagy related 14                                             | 4.4   | 4.0   | 5.1   | 4.2   | 4.1   | 3.3   |
| <b>XLOC_018981</b> | ABL1         | "ABL proto-oncogene 1, non-receptor tyrosine kinase"             | 20.9  | 35.5  | 19.7  | 37.1  | 15.4  | 34.4  |
| <b>XLOC_019486</b> | EVA1A        | eva-1 homolog A (C. elegans)                                     | 1.0   | 1.7   | 0.4   | 1.9   | 0.2   | 1.3   |
| <b>XLOC_019810</b> | HTR2B        | "5-hydroxytryptamine (serotonin) receptor 2B, G protein-coupled" | 1.7   | 3.6   | 0.9   | 4.1   | 1.0   | 2.4   |
| <b>XLOC_020423</b> | CISD2        | CDGSH iron sulfur domain 2                                       | 41.6  | 48.8  | 66.5  | 45.0  | 96.9  | 63.5  |
| <b>XLOC_020924</b> | ULK2         | unc-51 like autophagy activating kinase 2                        | 11.6  | 20.4  | 14.9  | 17.7  | 21.1  | 17.8  |
| <b>XLOC_021338</b> | LOC106046118 | uncharacterized LOC106046118                                     | 0.6   | 2.0   | 1.3   | 1.6   | 0.8   | 1.8   |
| <b>XLOC_021737</b> | MAP1LC3B     | microtubule-associated protein 1 light chain 3 beta              | 77.9  | 75.9  | 66.8  | 75.0  | 54.6  | 90.8  |
| <b>XLOC_022123</b> | VMP1         | vacuole membrane protein 1                                       | 22.4  | 21.4  | 34.2  | 19.6  | 34.8  | 20.3  |
| <b>XLOC_022428</b> | WDR45B       | WD repeat domain 45B                                             | 36.5  | 38.8  | 60.1  | 37.3  | 79.8  | 41.6  |
| <b>XLOC_022589</b> | PARK7        | parkinson protein 7                                              | 128.3 | 118.7 | 160.9 | 116.0 | 166.9 | 135.3 |
| <b>XLOC_023496</b> | BECN1        | "beclin 1, autophagy related"                                    | 190.1 | 59.9  | 76.3  | 65.2  | 31.7  | 67.2  |

---

Figure S1 Map of gene expression density

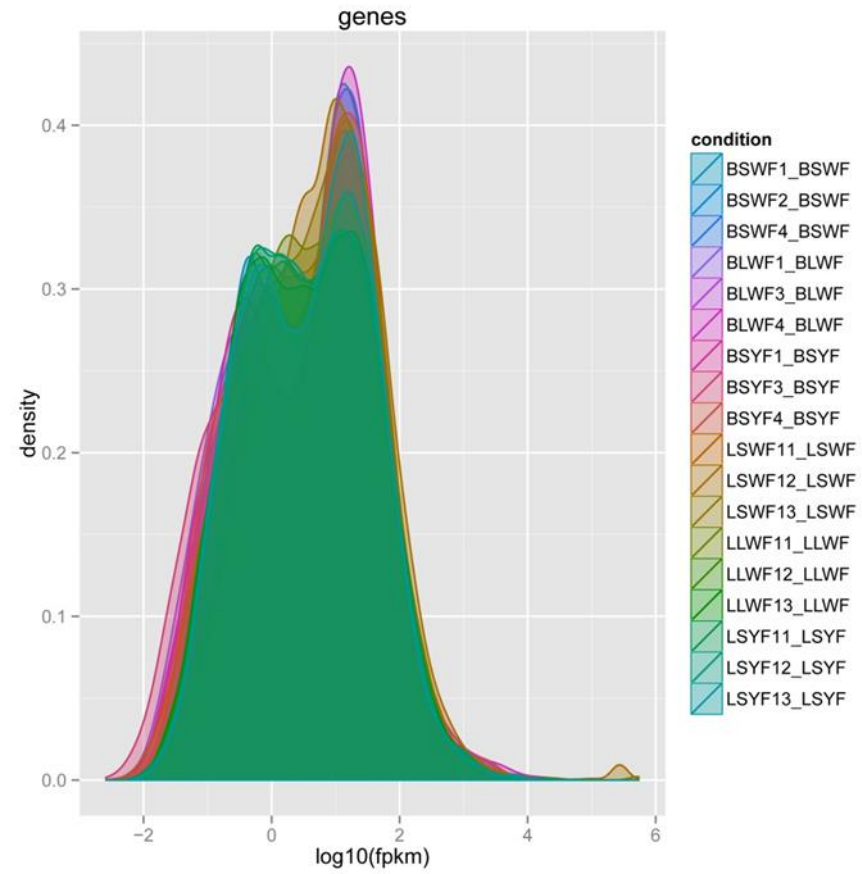

Origin picture of Figure 6c

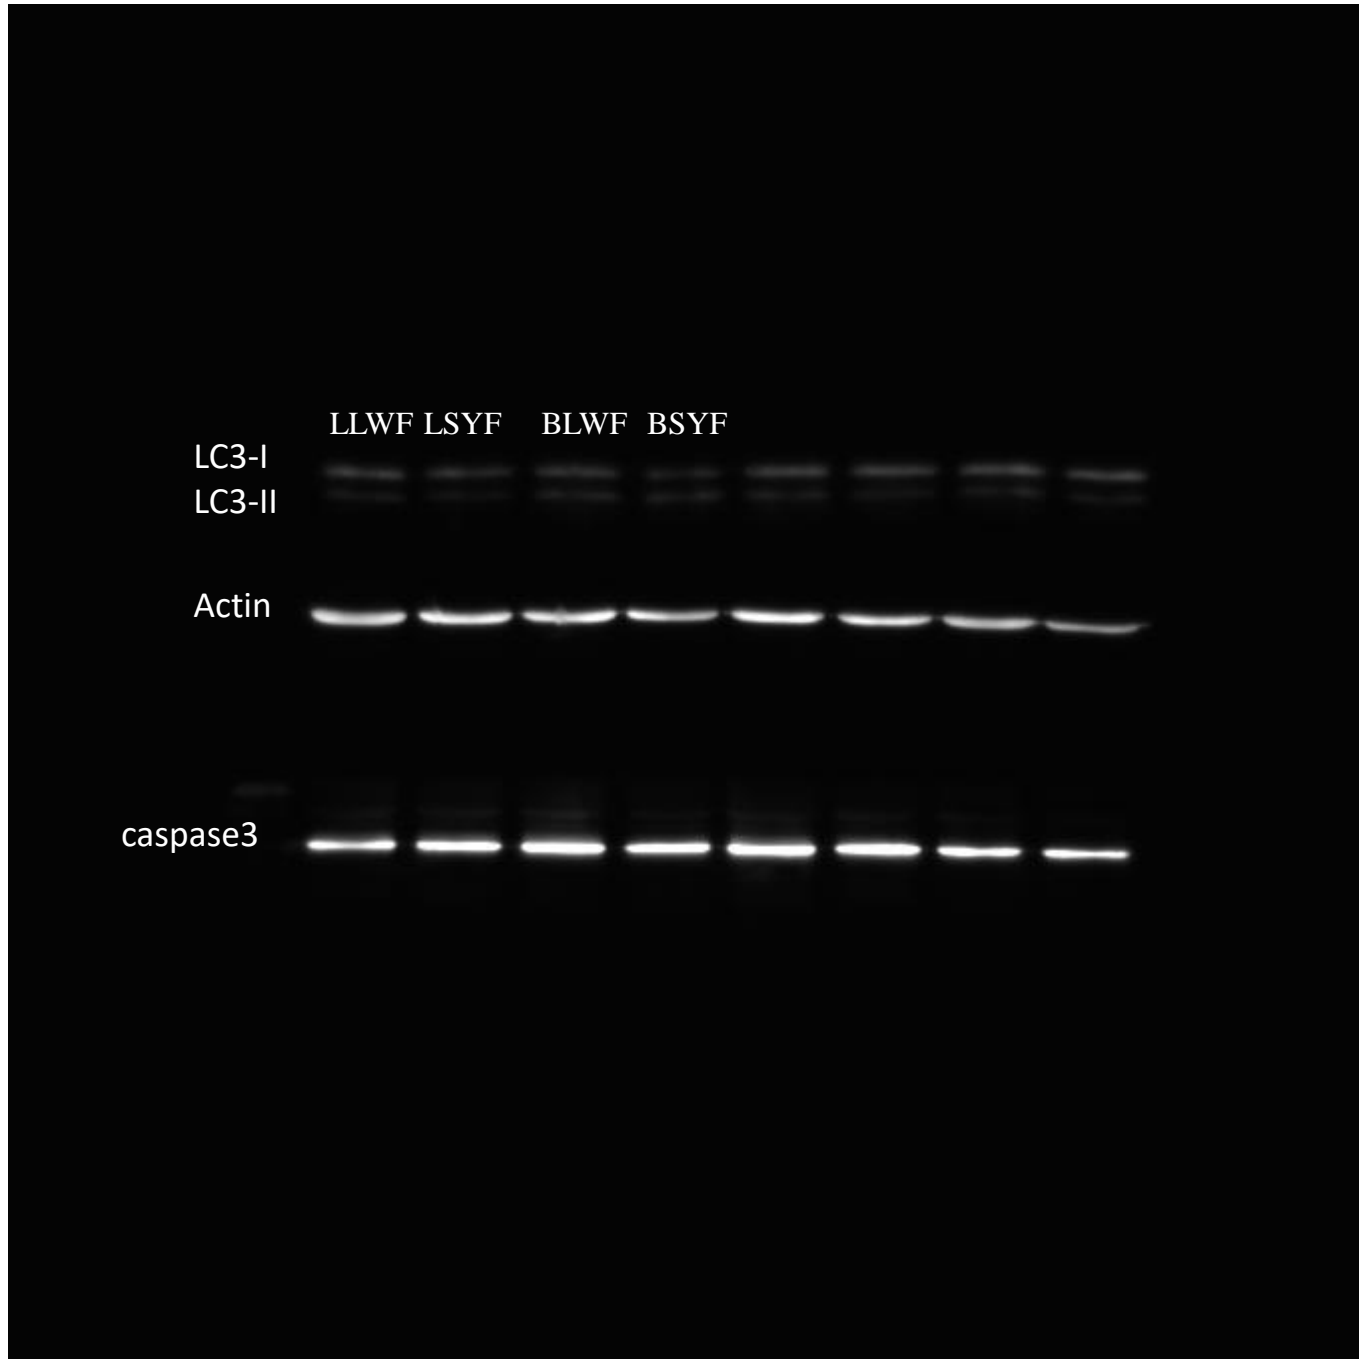

Supplement: srep36877-s1.pdf [file srep36877-s1.pdf]
